# Supplementary material for: The EX-FRAIL CKD trial: a study protocol for a pilot randomised controlled trial of a home-based EXercise programme for pre-frail and FRAIL, older adults with Chronic Kidney Disease
Source: PubMed Central journal article supplement — BMJ Open. 2020 Jun 22;10(6):e035344. doi: 10.1136/bmjopen-2019-035344 (PMC7311028; doi:10.1136/bmjopen-2019-035344), 2020-06-22
Supplement: bmjopen-2019-035344.draft_revisions.pdf [file bmjopen-2019-035344.draft_revisions.pdf]

# BMJ Open

BMJ Open is committed to open peer review. As part of this commitment we make the peer review history of every article we publish publicly available.

When an article is published we post the peer reviewers' comments and the authors' responses online. We also post the versions of the paper that were used during peer review. These are the versions that the peer review comments apply to.

The versions of the paper that follow are the versions that were submitted during the peer review process. They are not the versions of record or the final published versions. They should not be cited or distributed as the published version of this manuscript.

BMJ Open is an open access journal and the full, final, typeset and author-corrected version of record of the manuscript is available on our site with no access controls, subscription charges or pay-per-view fees (<http://bmjopen.bmj.com>).

If you have any questions on BMJ Open's open peer review process please email [info.bmjopen@bmj.com](mailto:info.bmjopen@bmj.com)

# BMJ Open

## The EX-FRAIL CKD Trial: A Study Protocol for a Pilot Mixed-Methods Randomised Controlled Trial of a home-based EXercise programme for pre-FRAIL and FRAIL, older adults with Chronic Kidney Disease

|                               |                                                                                                                                                                                                                                                                                                                                                                                                                                                                                                                                                                                                                                                                                                                                                                                                                                                                                                                                                                                                                                                                                                                                                                                                      |
|-------------------------------|------------------------------------------------------------------------------------------------------------------------------------------------------------------------------------------------------------------------------------------------------------------------------------------------------------------------------------------------------------------------------------------------------------------------------------------------------------------------------------------------------------------------------------------------------------------------------------------------------------------------------------------------------------------------------------------------------------------------------------------------------------------------------------------------------------------------------------------------------------------------------------------------------------------------------------------------------------------------------------------------------------------------------------------------------------------------------------------------------------------------------------------------------------------------------------------------------|
| Journal:                      | <i>BMJ Open</i>                                                                                                                                                                                                                                                                                                                                                                                                                                                                                                                                                                                                                                                                                                                                                                                                                                                                                                                                                                                                                                                                                                                                                                                      |
| Manuscript ID                 | bmjopen-2019-035344                                                                                                                                                                                                                                                                                                                                                                                                                                                                                                                                                                                                                                                                                                                                                                                                                                                                                                                                                                                                                                                                                                                                                                                  |
| Article Type:                 | Protocol                                                                                                                                                                                                                                                                                                                                                                                                                                                                                                                                                                                                                                                                                                                                                                                                                                                                                                                                                                                                                                                                                                                                                                                             |
| Date Submitted by the Author: | 29-Oct-2019                                                                                                                                                                                                                                                                                                                                                                                                                                                                                                                                                                                                                                                                                                                                                                                                                                                                                                                                                                                                                                                                                                                                                                                          |
| Complete List of Authors:     | Nixon, Andrew; Lancashire Teaching Hospitals NHS Foundation Trust, Department of Renal Medicine; The University of Manchester, Division of Cardiovascular Sciences<br>Bampouras, Theodoros ; Lancaster University Lancaster Medical School<br>Gooch, Helen ; NIHR Lancashire Clinical Research Facility, Centre for Health Research and Innovation; Lancashire Teaching Hospitals NHS Foundation Trust, Core Therapies Department<br>Young, Hannah; University of Leicester, Department of Respiratory Sciences; University Hospitals of Leicester NHS Trust, John Walls Renal Unit<br>Finlayson, Kenneth; University of Central Lancashire, Research in Childbirth and Health Unit<br>Pendleton, Neil; The University of Manchester, Division of Neuroscience and Experimental Psychology<br>Mitra, Sandip; The University of Manchester, Manchester Academy of Health Sciences Centre; National Institute of Health Research MedTech & In-vitro Diagnostics Co-operative, Devices for Dignity<br>Brady, Mark; Lancashire Teaching Hospitals NHS Foundation Trust, Department of Renal Medicine<br>Dhaygude, Ajay; Lancashire Teaching Hospitals NHS Foundation Trust, Department of Renal Medicine |
| Keywords:                     | Adult nephrology < NEPHROLOGY, Chronic renal failure < NEPHROLOGY, End stage renal failure < NEPHROLOGY, GERIATRIC MEDICINE                                                                                                                                                                                                                                                                                                                                                                                                                                                                                                                                                                                                                                                                                                                                                                                                                                                                                                                                                                                                                                                                          |
|                               |                                                                                                                                                                                                                                                                                                                                                                                                                                                                                                                                                                                                                                                                                                                                                                                                                                                                                                                                                                                                                                                                                                                                                                                                      |

SCHOLARONE™  
Manuscripts

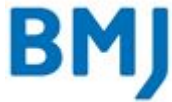

I, the Submitting Author has the right to grant and does grant on behalf of all authors of the Work (as defined in the below author licence), an exclusive licence and/or a non-exclusive licence for contributions from authors who are: i) UK Crown employees; ii) where BMJ has agreed a CC-BY licence shall apply, and/or iii) in accordance with the terms applicable for US Federal Government officers or employees acting as part of their official duties; on a worldwide, perpetual, irrevocable, royalty-free basis to BMJ Publishing Group Ltd ("BMJ") its licensees and where the relevant Journal is co-owned by BMJ to the co-owners of the Journal, to publish the Work in this journal and any other BMJ products and to exploit all rights, as set out in our [licence](#).

The Submitting Author accepts and understands that any supply made under these terms is made by BMJ to the Submitting Author unless you are acting as an employee on behalf of your employer or a postgraduate student of an affiliated institution which is paying any applicable article publishing charge ("APC") for Open Access articles. Where the Submitting Author wishes to make the Work available on an Open Access basis (and intends to pay the relevant APC), the terms of reuse of such Open Access shall be governed by a Creative Commons licence – details of these licences and which [Creative Commons](#) licence will apply to this Work are set out in our licence referred to above.

Other than as permitted in any relevant BMJ Author's Self Archiving Policies, I confirm this Work has not been accepted for publication elsewhere, is not being considered for publication elsewhere and does not duplicate material already published. I confirm all authors consent to publication of this Work and authorise the granting of this licence.

1  
2  
3  
4  
5  
6  
7  
8  
9  
10  
11  
12  
13  
14  
15  
16  
17  
18  
19  
20  
21  
22  
23  
24  
25  
26  
27  
28  
29  
30  
31  
32  
33  
34  
35  
36  
37  
38  
39  
40  
41  
42  
43  
44  
45  
46  
47  
48  
49  
50  
51  
52  
53  
54  
55  
56  
57  
58  
59  
60

# The EX-FRAIL CKD Trial: A Study Protocol for a Pilot Mixed-Methods Randomised Controlled Trial of a home-based EXercise programme for pre-FRAIL and FRAIL, older adults with Chronic Kidney Disease

Andrew C. Nixon<sup>1-3</sup>, Theodoros M. Bampouras<sup>4</sup>, Helen J. Gooch<sup>3,5</sup>, Hannah M.L. Young<sup>6,7</sup>,  
Kenny W. Finlayson<sup>8</sup>, Neil Pendleton<sup>9</sup>, Sandip Mitra<sup>10,11</sup>, Mark E. Brady<sup>1</sup>, Ajay P. Dhaygude<sup>1</sup>

<sup>1</sup>Department of Renal Medicine, Lancashire Teaching Hospitals NHS Foundation Trust, Preston, UK, <sup>2</sup>Division of Cardiovascular Sciences, University of Manchester, Manchester, UK, <sup>3</sup>Centre for Health Research and Innovation, National Institute of Health Research Lancashire Clinical Research Facility, Lancashire Teaching Hospitals NHS Foundation Trust, Preston, UK, <sup>4</sup>Lancaster Medical School, Lancaster University, Lancaster, UK, <sup>5</sup>Core Therapies Department, Lancashire Teaching Hospitals NHS Foundation Trust, Preston, UK, <sup>6</sup>Department of Respiratory Sciences, University of Leicester, Leicester, UK, <sup>7</sup>John Walls Renal Unit, University Hospitals of Leicester NHS Trust, Leicester, UK, <sup>8</sup>Research in Childbirth and Health Unit, University of Central Lancashire, Preston, UK, <sup>9</sup>Division of Neuroscience and Experimental Psychology, University of Manchester, Manchester, UK, <sup>10</sup>Manchester Academy of Health Sciences Centre, University of Manchester, Manchester, UK, <sup>11</sup>Devices for Dignity, National Institute of Health Research MedTech & In-vitro Diagnostics Co-operative, UK.

1  
2  
3 **Corresponding Author:** Dr Andrew C. Nixon, Department of Renal Medicine, Lancashire

4  
5 Teaching Hospitals NHS Foundation Trust, Royal Preston Hospital, Sharoe Green Lane,

6  
7 Preston, PR2 9HT, UK. Phone 0044-1772523748; Fax 0044-1772523516; e-mail:

8  
9  
10 [andrew.nixon@lthtr.nhs.uk](mailto:andrew.nixon@lthtr.nhs.uk)

11  
12  
13  
14  
15 **Study Sponsor:** Dr Kina Bennett (Research Operations Manager), Centre for Health Research

16  
17 and Innovation, NIHR Lancashire Clinical Research Facility, Lancashire Teaching Hospitals

18  
19 NHS Foundation Trust, Royal Preston Hospital, Sharoe Green Lane, Preston, PR2 9HT, UK.

20  
21  
22  
23 Phone 0044-1772524611

24  
25  
26  
27 **Protocol Version:** 1.2 (13/03/2019)

**Keywords:** Adult Nephrology, Chronic Renal Failure, End Stage Renal Failure, Geriatric  
Medicine.

### List of Abbreviations

|             |                                                    |
|-------------|----------------------------------------------------|
| CKD         | Chronic Kidney Disease                             |
| FES-I       | Falls Efficacy Scale-International                 |
| FP          | Frailty Phenotype                                  |
| HRQOL       | Health-Related Quality of Life                     |
| LTHTR       | Lancashire Teaching Hospitals NHS Foundation Trust |
| MRC         | Medical Research Council                           |
| NHS         | National Health Service                            |
| NIHR        | National Institute of Health Research              |
| POS-S RENAL | Palliative Care Outcome Scale-Symptoms RENAL       |
| RCT         | Randomised Controlled Trial                        |
| SF-12       | Short Form-12v2                                    |
| SPPB        | Short Physical Performance Battery                 |

## ABSTRACT

### Introduction

Frailty is highly prevalent in adults with chronic kidney disease (CKD) and is associated with adverse health outcomes including falls, poorer health-related quality of life (HRQOL), hospitalisation and mortality. Low physical activity and muscle wasting are important contributors to physical frailty in adults with CKD. Exercise training may improve physical function and frailty status leading to associated improvements in health outcomes, including HRQOL. The EX-FRAIL CKD trial aims to inform the design of a definitive randomised controlled trial (RCT) that investigates the efficacy of a progressive, multi-component home-based exercise programme in pre-frail and frail older adults with CKD.

### Methods and Analysis

The EX-FRAIL CKD trial is a mixed-methods, two-arm parallel group pilot RCT. Participants categorised as pre-frail or frail, following Frailty Phenotype assessment, will be randomised to receive exercise or usual care. Participants randomised to the intervention arm will receive a tailored 12-week exercise programme, which includes weekly telephone calls to advise on exercise progression. Primary feasibility outcome measures include rate of recruitment, intervention adherence, outcome measure completion and participant attrition. Semi-structured interviews with a purposively selected group of participants will inform the feasibility of the randomisation procedures, outcome measures and intervention. Secondary outcome measures include physical function (walking speed and Short Physical Performance Battery), frailty status (Frailty Phenotype), fall concern (Falls Efficacy Scale-International tool), activities of daily living (Barthel Index), symptom-burden (Palliative Care Outcome Scale-Symptoms RENAL) and HRQOL (Short Form-12v2).

## Ethics and Dissemination

Ethical approval was granted by a National Health Service (NHS) Regional Ethics Committee and the NHS Health Research Authority. The study team aim to publish findings in a peer-reviewed journal and present the results at relevant national and international conferences.

A summary of findings will be provided to participants, a local kidney patient charity and the funding body.

**Trial Registration:** ISRCTN87708989.



### STRENGTHS AND LIMITATIONS OF THIS STUDY

- To our knowledge, this is the first pilot randomised controlled trial (RCT) to evaluate the feasibility of a progressive home-based exercise intervention specifically designed for pre-frail and frail older adults with chronic kidney disease (CKD).
- A validated assessment of frailty will be used to determine suitability for randomisation ensuring that only pre-frail and frail participants receive the intervention, thereby strengthening any conclusions that are made following study completion.
- The exercise programme is delivered in a graded and progressive manner with the use of weekly telephone calls to ensure safe exercise practices and provide ongoing encouragement.
- A nested qualitative study will explore the acceptability of the randomisation procedures, outcome measures and intervention, thus identifying areas for adaptation in a definitive RCT.
- Semi-structured interviews will be completed by a researcher involved in delivery of the study intervention, which may influence participant responses.

**Word Count:** 4000

## INTRODUCTION

Frailty is the consequence of a cumulative decline in multiple physiological systems associated with ageing [1]. This results in a state of increased vulnerability to disproportionate changes in health status when exposed to seemingly minor insults, such as an infection or fall [1]. Frailty, and its precursor pre-frailty, are associated with an increased risk of falls, hospitalisation, worsening disability and death [2]. The pathophysiological process inherent to chronic kidney disease (CKD), including, though not limited to, uraemia, anabolic hormone dysregulation, increased inflammatory burden, metabolic acidosis and cellular senescence, appear to hasten the decline from fitness to frailty [3]. This is to such an extent that the prevalence of frailty in CKD, particularly by the time of dialysis initiation, is considerably greater than in the community-dwelling older adult population [4, 5].

Importantly, as in the general older population, patients with CKD and frailty have worse outcomes than their non-frail counterparts. Frailty is independently linked with adverse clinical outcomes in all stages of CKD, including an increased risk of worse health-related quality of life (HRQOL) [6, 7], falls [8], hospitalisation and mortality [9-11].

Low physical activity and associated muscle wasting are important contributors to physical frailty [12]. Physical activity is low in patients with advanced CKD [13] and muscle wasting is pronounced prior to the commencement of dialysis [14]. Increased physical activity levels in those with CKD and pre-frailty/frailty may mitigate this muscle wasting. Exercise training has been shown to improve physical fitness and HRQOL in CKD populations [15, 16]. However, patients living with frailty are typically poorly represented in interventional studies, often due to concerns that drop-out rates, adverse events or intervention tolerability may be affected [17, 18]. Studies that have explored the use of exercise training in frail older adults

1  
2  
3 have demonstrated benefits in terms of ‘falls, mobility, balance, functional ability, muscle  
4 strength and body composition’ [19]. However, the optimum exercise programme has not  
5  
6 been established [19]. Regardless, exercise programmes that are effective for frail older  
7  
8 adults may not meet the needs of patients living with frailty and CKD, who are more likely to  
9  
10 be frail at a younger age [10], report considerable symptom burden [20] and have high  
11  
12 health care utilisation [21].  
13  
14  
15  
16

17  
18  
19  
20 Many exercise programmes used in studies involving participants with CKD have been  
21  
22 performed under supervision within hospital or other facilities [15, 16], circumstances that  
23  
24 can be challenging to implement in clinical practice considering financial and staffing  
25  
26 constraints. Furthermore, travel for exercise sessions may be onerous for frail individuals  
27  
28 with CKD who often report higher levels of fatigue [7]. Home-based exercise programmes  
29  
30 may be less burdensome and more convenient, allowing patients to incorporate physical  
31  
32 activity into their daily lives leading to longer term adoption and maintenance of increased  
33  
34 physical activity [22]. There is evidence in the gerontology literature that home-based  
35  
36 exercise interventions may improve disability in older people with frailty [23]. However,  
37  
38 research is needed to evaluate the benefits of a pragmatic, progressive home-based  
39  
40 exercise programme tailored to the needs of people living with frailty and CKD.  
41  
42  
43  
44  
45  
46  
47  
48

49 As recommended by the Medical Research Council (MRC) guidance for developing and  
50  
51 evaluating complex interventions [24], pilot studies should be used to address key  
52  
53 uncertainties prior to the definitive evaluation of complex interventions. Given the  
54  
55 uncertainties previously described, a pilot mixed-methods randomised controlled trial (RCT)  
56  
57 of a home-based exercise programme for pre-frail and frail older adults with CKD is  
58  
59  
60

1  
2  
3 necessary. This will inform the design of a large-scale RCT that investigates the effect of a  
4  
5 home-based exercise intervention on physical function, frailty status, fall concern, activities  
6  
7 of daily living, symptom-burden and HRQOL in pre-frail and frail older adults with CKD. The  
8  
9 2013 SPIRIT guidelines [25, 26] will be used as the framework for reporting the EX-FRAIL  
10  
11 CKD trial protocol.  
12  
13  
14  
15  
16  
17

## 18 **Objectives**

19  
20 A pilot mixed-methods RCT will be performed that aims to:  
21

- 22  
23 1. Evaluate rate of participant recruitment, intervention adherence, outcome measure  
24  
25 completion and attrition.  
26  
27
- 28  
29 2. Qualitatively explore the acceptability of the randomisation procedure, outcome  
30  
31 measures and, in the intervention arm, a progressive home-based exercise  
32  
33 programme and identify areas requiring adaptation for a definitive RCT.  
34
- 35  
36 3. Estimate the standard deviation of walking speed in pre-frail and frail patients with  
37  
38 CKD to allow sample size estimation for a definitive RCT.  
39  
40  
41  
42  
43  
44  
45  
46  
47  
48  
49  
50  
51  
52  
53  
54  
55  
56  
57  
58  
59  
60

## METHODS AND ANALYSIS

### Design

The EX-FRAIL CKD trial is a mixed-methods, two-arm parallel group pilot RCT. Outcome assessments will be performed at baseline and 12 weeks' post-randomisation. A nested-qualitative study will be performed following completion of 12-week follow-up visits to explore participant perceptions of the study and, where applicable, the study intervention.

### Study Setting

Participants will be recruited from outpatient clinics at Lancashire Teaching Hospitals NHS Foundation Trust (LTHTR), East Lancashire Teaching Hospitals NHS Trust and Blackpool Teaching Hospitals NHS Foundation Trust. The regional nephrology service operates a 'hub and spoke' model, accordingly participants attending clinics at sites other than LTHTR are still under the care of the LTHTR nephrology service.

### Inclusion Criteria

Patients aged  $\geq 65$  years old with CKD G3b-5 (not receiving dialysis or received a kidney transplant) identified as at least 'vulnerable' using the Clinical Frailty Scale (score  $\geq 4$ ) are eligible for participation [27]. The Clinical Frailty Scale is a 9-point scale that provides definitions for levels of frailty and has good diagnostic accuracy for identifying frailty in patients with advanced CKD [27, 28]. It has been adopted as a frailty screening measure within usual care and will maximise the likelihood of pre-frail and frail patients being approached for study involvement. Patients must also be able to give informed consent.

## Exclusion Criteria

1. In accordance with the American College of Sport's Medicine [29]:
  - Unstable Angina or recent (within the last 3 months) myocardial infarction.
  - Uncontrolled arrhythmias.
  - Persistent uncontrolled hypertension (systolic blood pressure >180 mmHg or diastolic blood pressure >110 mmHg).
1. Recent (within the last 3 months) stroke or transient ischaemic attack.
2. Registered blind.
3. Unable to mobilise independently.
4. Receiving palliative care for advanced terminal cancer.
5. Recently (within the last 12 months) enrolled in a structured exercise programme (e.g. cardiac rehabilitation) prescribed by a health professional.
6. Anticipated to commence dialysis or receive a renal transplant within the next 3 months.
7. Insufficient understanding of the English language to complete study questionnaires or follow advice within the exercise programme guidebook.
8. Clinical and/or research team consider participation in the exercise programme unsafe.

## Timeline

Figure 1 illustrates the participant flow through the study. Potentially eligible patients will be given a participant information sheet. Patients will then be telephoned to establish if they are interested in participating and to ensure eligibility. Patients will be offered an appointment with the Chief Investigator, at least 24 hours following the telephone call, to obtain written informed consent to participate in the study.

1  
2  
3  
4  
5  
6 The Frailty Phenotype (FP) is currently considered the reference standard method to  
7  
8 diagnose physical frailty in CKD populations [2, 5]. However, it is not routinely performed in  
9  
10 clinical practice and therefore will only be performed following study consent. The FP  
11  
12 includes 5 components, as detailed in Table 1 [2]. Frailty is diagnosed if an individual is  
13  
14 assessed as having 3 components and pre-frailty if an individual has 1 or 2 components [2].  
15  
16 Participants will have a FP assessment pre-randomisation and will be withdrawn from the  
17  
18 study if they are categorised as robust (i.e. not pre-frail or frail). Participants categorised as  
19  
20 pre-frail or frail will be randomised to exercise or usual care groups and will complete all  
21  
22 outcome assessments as detailed in Table 2. Follow-up outcome assessments will be  
23  
24 performed 12-weeks post-randomisation. A group of participants will be invited to  
25  
26 participate in semi-structured interviews following 12-week follow-up assessments.  
27  
28  
29  
30  
31  
32  
33  
34

### 35 **Sample Size**

36  
37 We aim to recruit 40 participants to allow for a dropout rate (that includes participants  
38  
39 categorised as robust using the FP) of up to 50% and still provide sufficient data to assess  
40  
41 study feasibility and estimate the standard deviation of walking speed to inform the sample  
42  
43 size calculation of a definitive RCT [30, 23, 19, 31]. Semi-structured interviews will be  
44  
45 conducted with a purposively selected group of participants, from both study arms,  
46  
47 considering age, gender and frailty status. A pragmatic sample size of 12-14 participants will  
48  
49 be recruited to this nested qualitative study.  
50  
51  
52  
53  
54  
55  
56

### 57 **Allocation and Blinding**

58  
59 Participants will be randomised in a 1:1 ratio to either the intervention or usual care. A  
60

1  
2  
3 central, concealed web-based randomisation process ([www.sealedenvelope.com](http://www.sealedenvelope.com)) will be  
4  
5 performed in blocks of 4. Stratification will be limited to one factor, FP status, leaving 2  
6  
7 strata, i.e. pre-frailty and frailty [32]. This will ensure that both groups contain similar  
8  
9 proportions of pre-frail and frail participants. Participants cannot be blinded to the outcome  
10  
11 of randomisation due to the nature of the intervention. Furthermore, outcome assessors  
12  
13 will not be blinded to the outcome of randomisation as this pilot study does not aim to  
14  
15 evaluate intervention efficacy. Blinding of outcome assessors will be performed if a  
16  
17 definitive RCT is considered feasible.  
18  
19  
20  
21  
22  
23  
24  
25  
26

### 27 **Intervention Development**

28  
29  
30 The EX-FRAIL CKD exercise programme is a 12-week progressive, multi-component home-  
31  
32 based exercise programme. It was developed through review of international guidance and  
33  
34 systematic reviews that evaluated exercise interventions in CKD and older adult  
35  
36 populations. A 2014 systematic review demonstrated that exercise training is associated  
37  
38 with improved health outcomes in adults with CKD [16]. However, most studies evaluated  
39  
40 interventions in adults with dialysis-dependent CKD and mostly aerobic exercise  
41  
42 interventions [16]. The authors recommended further evaluation in non-dialysis populations  
43  
44 and further analysis of resistance training and multi-component interventions [16]. Several  
45  
46 systematic reviews have demonstrated that frail older adults benefit from exercise  
47  
48 programmes and reported multi-component exercise programmes (involving combinations  
49  
50 of strength, aerobic and balance training) were often effective [33, 34, 19]. A 2012 Cochrane  
51  
52 review determined that both multi-component group exercise and home-based exercise  
53  
54 reduce the rate of falls in older adults [35]. Furthermore, a systematic review of home-  
55  
56  
57  
58  
59  
60



1  
2  
3 based exercise programmes suggested that there is preliminary evidence that home-based  
4  
5 exercise interventions may improve disability in older adults with moderate frailty [23]. The  
6  
7 American College of Sports Medicine and American Heart Association Guidelines highlight  
8  
9 the importance of physical activity being increased gradually in older adults, particularly  
10  
11 those that are very deconditioned [36]. Additionally, the guidelines recommend that older  
12  
13 adults who reduce their sedentary behaviour, even if not to the level recommended, still  
14  
15 attain health benefits [36].  
16  
17  
18  
19  
20  
21  
22

### 23 **Intervention Description**

24  
25  
26 Participants randomised to the intervention will receive an individual exercise education  
27  
28 session delivered by a physiotherapist experienced in exercise prescription. Participants will  
29  
30 be provided information about the potential benefits of physical activity for their general  
31  
32 health and well-being. They will subsequently receive instruction on how to complete the  
33  
34 exercises within the exercise programme safely and effectively. The exercises will be  
35  
36 demonstrated to participants by a physiotherapist. The participants will then be asked to  
37  
38 practice the exercises under supervision to ensure appropriate technique. If a participant is  
39  
40 unable to perform a specific exercise, for example due to a functional limitation, an  
41  
42 alternative will be provided that focuses on the same muscle groups. Furthermore, if a  
43  
44 participant is unable to complete the proposed number of repetitions, the participant will  
45  
46 be advised to perform a lower number of repetitions initially. This approach reflects exercise  
47  
48 prescription in clinical practice and should increase the feasibility and safety of the exercise  
49  
50 programme.  
51  
52  
53  
54  
55  
56  
57  
58  
59  
60

1  
2  
3 Table 3 demonstrates the six exercises within the programme and details the progressions  
4  
5 for each exercise. Participants categorised as frail will initially be advised to perform each  
6  
7 exercise at level 1, whereas participants categorised as pre-frail will be advised to perform  
8  
9 each exercise at level 2, unless the physiotherapist determines that it would be unsafe for  
10  
11 an individual participant to perform a specific exercise at this level. Participants will receive  
12  
13 education on how to use the Borg rating of perceived exertion [37] and will be advised to  
14  
15 perform exercise 1 at a light intensity (Borg score <12) and exercises 2-6 at a moderate  
16  
17 intensity (Borg score 12-16). Participants will be asked to gradually increase physical activity  
18  
19 levels so that they ultimately perform three exercise sessions at home per week, with each  
20  
21 session lasting approximately 30-45 minutes. Participants will be provided an exercise  
22  
23 guidebook comprising written guidance on each exercise with accompanying photographs  
24  
25 of models demonstrating the exercises.  
26  
27  
28  
29  
30  
31  
32  
33  
34

35 Participants will be encouraged to complete an exercise diary. The diary prompts  
36  
37 participants to document each exercise session including when they exercised, if they  
38  
39 completed all exercises, the duration to complete the full exercise session and their Borg  
40  
41 rating of perceived exertion for each exercise completed. Participants randomised to the  
42  
43 intervention will receive weekly telephone calls from the physiotherapist or a specialist  
44  
45 trainee in renal medicine who has clinical and research experience with patients living with  
46  
47 frailty and CKD. To enhance intervention fidelity, a telephone pro forma will be used that  
48  
49 prompts a review of the participants exercise diary, exercise technique, any problems  
50  
51 (including symptoms, falls and healthcare episodes), an exploration of any participant  
52  
53 uncertainties about the exercise programme and goal-setting for the following week. The  
54  
55 physiotherapist and specialist trainee will discuss the outcomes of telephone calls, as a  
56  
57  
58  
59  
60

1  
2  
3 further safeguard of intervention fidelity. The telephone calls will be used to provide  
4  
5 ongoing encouragement and to advise on exercise progression. If participants can perform  
6  
7 exercises 2-6 comfortably (Borg score <12), the physiotherapist or specialist trainee will  
8  
9 discuss exercise progression with the participant. If required, participants will be offered  
10  
11 additional educational sessions during the 12-week intervention period to ensure safe  
12  
13 exercise technique when progressing to more difficult exercise levels. Table 4 summarises  
14  
15 the intervention using the Template for Intervention Description and Replication (TIDieR)  
16  
17 checklist [38].  
18  
19  
20  
21  
22  
23  
24

### 25 **Patient and Public Involvement**

26  
27 The study was presented to the LTHTR Research Development Group, which includes lay  
28  
29 members. Feedback from this meeting led to the adoption of a mixed-methods study design  
30  
31 that included participant interviews. The proposed study was also presented to members of  
32  
33 a local kidney patient charity, discussed in a patient focus group, supported by funding  
34  
35 received from National Institute of Health Research (NIHR) Research Design Service, and  
36  
37 with the LTHTR Lay Research Group, which is a group of local lay representatives. The study  
38  
39 team were encouraged by positive feedback received on proposed study visits, outcome  
40  
41 assessments and the exercise programme, including the burden of the intervention.  
42  
43  
44  
45  
46  
47  
48  
49

### 50 **Primary Feasibility Outcome Measures**

51  
52 Primary feasibility outcome measures will be assessed as recommended by the CONSORT  
53  
54 randomised pilot and feasibility trial guidelines [39]. The proportion of patients attending  
55  
56 nephrology clinics that are eligible for study consent and the proportion of eligible patients  
57  
58 subsequently recruited will be recorded. Reasons for ineligibility and non-consent will be  
59  
60

1  
2  
3 recorded. In the intervention arm, adherence will be assessed by telephoning participants  
4  
5 weekly to review the preceding week's exercise activity and by reviewing participant  
6  
7 exercise diaries at the end of the study period. Reasons for non-adherence will be  
8  
9 documented. The proportion of participants who complete all outcome measures and who  
10  
11 are lost to follow-up will be assessed. Reasons for failure to complete outcome measures  
12  
13 and for study withdrawal will be recorded.  
14  
15  
16

17  
18  
19  
20 Using a predetermined topic guide, the specialist trainee will conduct semi-structured face-  
21  
22 to-face interviews with participants. The interviews aim to explore the acceptability of the  
23  
24 randomisation procedure, outcome measures and, in the intervention arm, a progressive  
25  
26 home-based exercise programme. Perceived safety and barriers to participation will be  
27  
28 explored. The interviews will be conducted in a private environment at the NIHR Lancashire  
29  
30 Clinical Research Facility. Interviews will be audio recorded using a digital recorder with the  
31  
32 participant's consent and will last approximately 30-60 minutes. Interviews will be  
33  
34 transcribed verbatim.  
35  
36  
37  
38  
39  
40  
41

42 A 'stop', 'change' and 'go' approach to progression criteria will be used as described in the  
43  
44 literature [40], with qualitative data used to identify areas for adaptation for a definitive RCT  
45  
46 if required. Table 5 details the study progression criteria.  
47  
48  
49  
50  
51

## 52 **Secondary Outcome Measures**

### 53 **1. Physical Function**

54 Walking speed is independently associated with all-cause mortality in adults with CKD [41].

55 Walking speed will be assessed using infrared timing gates (Brower Timing System 2012,  
56  
57  
58  
59  
60

1  
2  
3 Brower Timing Systems, Draper, UT, USA). Participants will be asked to walk 15 feet at their  
4  
5 normal walking pace on two occasions, using their usual walking aid if applicable. The  
6  
7 fastest of two assessments will be used for analysis. A meaningful change in walking speed  
8  
9 has been described as 0.05 metres per second [42, 43].  
10  
11  
12  
13  
14

15 The Short Physical Performance Battery (SPPB) comprises a group of measures of lower  
16  
17 extremity function that together can be used to generate a composite score between 0 and  
18  
19 12 [44]. SPPB score is associated with mortality in adults with CKD [45]. A minimally significant  
20  
21 change in SPPB has been reported as 0.5 points [42, 43]. The measures included in the SPPB  
22  
23 are:  
24  
25  
26  
27

- 28 • Five chair stands: timed standing from a chair at a standardised height five times as quickly  
29  
30 as able.
- 31  
32 • Balance testing: stand in three positions with increasing difficulty (standing with feet side  
33  
34 by side, in a semi-tandem position and in a full tandem position) for 10 seconds in each  
35  
36 position.  
37  
38
- 39 • Walking speed: timed walking 8 feet at usual pace.  
40  
41  
42  
43  
44  
45  
46  
47

## 48 **2. Frailty**

49  
50

51 As described earlier and detailed in Table 1, the FP can be used to diagnose pre-frailty and  
52  
53 frailty [2], which are associated with adverse outcomes in CKD populations [9-11, 8, 6, 7].  
54  
55 Studies have not evaluated the change in frailty status following exercise interventions in CKD  
56  
57  
58  
59  
60

1  
2  
3 populations. However, McAdams-DeMarco et al demonstrated an improvement in Frailty  
4  
5 Phenotype score of 0.3 points following transplantation [46].  
6  
7  
8  
9

### 10 **3. Activities of Daily Living**

11  
12 The Barthel Index evaluates independence with 10 activities of daily living to generate a score  
13  
14 between 0 and 100 [47]. Higher scores indicate greater independence.  
15  
16  
17  
18  
19

### 20 **4. Falls**

21  
22 The Falls Efficacy Scale-International (FES-I) tool will be used to assess fall concern [48, 49]. It  
23  
24 is a self-report questionnaire that asks individuals to rate their fall concern for 16 situations  
25  
26 on a four-point scale. The answers are totalled to provide a cumulative score between 16 and  
27  
28 64. A score between 16 and 19 indicates low fall concern, between 20 and 27 moderate fall  
29  
30 concern and between 28 and 64 high fall concern. The number of falls within the preceding 6  
31  
32 months will also be recorded.  
33  
34  
35  
36  
37  
38  
39

### 40 **5. Symptom-Burden**

41  
42 The Palliative Care Outcome Scale-Symptoms RENAL (POS-S RENAL) will be used to assess  
43  
44 symptom burden [50]. The POS-S RENAL questionnaire asks individuals to report 17  
45  
46 symptoms that may have affected them over the preceding week and to indicate to what  
47  
48 extent. Each symptom is scored and scores totalled to create a symptom-burden score with  
49  
50 higher scores representing greater symptom-burden.  
51  
52  
53  
54  
55

### 56 **6. HRQOL**

1  
2  
3 The Short Form-12v2 (SF-12) comprises 12 questions that are used to assess HRQOL [51, 52].  
4  
5 The answers are used to produce an 8-scale profile of health and well-being and to generate  
6  
7 physical and mental health summary measures. Higher SF-12 scores represent better HRQOL.  
8  
9  
10 The proposed minimal important difference for SF-12 summary scales is 3 T-score points [53].  
11  
12  
13  
14

### 15 **Data Management**

16  
17 All electronic study data will be recoded on a secure, password-protected database on the  
18  
19 LTHTR server. The server is only be accessible using password-protected user profiles on  
20  
21 LTHTR computers. Participant names and hospital identification numbers will not be  
22  
23 recorded on this database; participants will be identified by a study-specific participant  
24  
25 number. There will not be a formal data monitoring committee. However, data will be  
26  
27 managed in accordance with the LTHTR Information Governance Policy.  
28  
29  
30  
31  
32  
33  
34

### 35 **Analysis Plan**

36  
37 As recommended by the 2010 CONSORT guidelines [39], feasibility quantitative outcome  
38  
39 measures will be reported descriptively with 95% confidence intervals. This will include the  
40  
41 proportion of eligible patients and recruited participants, participants who adhere to the  
42  
43 intervention, participants who complete all outcome assessments and participants lost to  
44  
45 follow-up. Secondary outcome measures will also be reported descriptively with 95%  
46  
47 confidence intervals. The standard deviation of walking speed will be estimated for both  
48  
49 trial arms to inform the sample size calculation for a definitive RCT. SPSS software (version  
50  
51 25, IBM Corp) will be used for statistical analysis.  
52  
53  
54  
55  
56  
57  
58  
59  
60

1  
2  
3 Qualitative data will be analysed using thematic analysis whereby narrative segments will  
4 first be coded and then translated into more abstract themes in an iterative manner [54].  
5  
6 NVivo software (version 12.5.0, QSR International) will be used to support analysis. Two  
7  
8 members of the researcher team will compare themes to ensure all codes are represented.  
9  
10  
11 Qualitative and quantitative findings will be linked to provide a more comprehensive  
12  
13 understanding of trial and intervention acceptability.  
14  
15  
16  
17  
18  
19

### 20 **Adverse Events**

21  
22 Serious adverse events are defined as any episode during the study period that requires  
23 inpatient hospitalisation, results in persistent/significant disability, is life threatening or  
24 results in death. All adverse events will be discussed with the medically-trained Chief  
25 Investigator who will assess seriousness and causality. All adverse events will be reported to  
26 the study sponsor and all suspected unexpected serious adverse reactions reported to the  
27 regional ethics committee. The trial will be stopped prematurely if three or more suspected  
28 unexpected serious adverse reactions occur.  
29  
30  
31  
32  
33  
34  
35  
36  
37  
38  
39  
40  
41

### 42 **Study Steering Committee**

43  
44 A study steering committee will provide scientific, ethical and financial oversight of research  
45 activity. The committee comprises clinicians, physiotherapists, academics, the study sponsor  
46 and a patient representative. Meetings will be held during before, during and on completion  
47 of the study. The patient representative will be remunerated as recommended by INVOLVE.  
48  
49  
50  
51  
52  
53  
54  
55  
56

### 57 **Ethics and Dissemination**



1  
2  
3 Study ethical approval has been granted by the North West Greater Manchester East  
4  
5 Research Ethics Committee (reference 18/NW/0211) and the National Health Service (NHS)  
6  
7 Health Research Authority (project reference 244772). The LTHTR Centre for Health  
8  
9 Research and Innovation accepted the role and responsibilities of study sponsorship. The  
10  
11 study is subject to the LTHTR Internal Research and NIHR audit programmes to ensure all  
12  
13 research activities are performed in accordance with the international standards of Good  
14  
15 Clinical Practice, United Kingdom clinical trials legislation and trust policies. The trial is  
16  
17 registered with the International Standard Randomised Controlled Trial Number Registry  
18  
19 (ISRCTN87708989). Protocol amendments approved by the Research Ethics Committee/NHS  
20  
21 Health Research Authority will be communicated with the study sponsor, study team and,  
22  
23 where necessary, the trial registry.  
24  
25  
26  
27  
28  
29  
30  
31

32 The study dataset will not be made publicly available as it may be possible to identify  
33  
34 participants from interview transcripts and as this pilot study does not aim to use  
35  
36 quantitative data to demonstrate intervention efficacy. The study team aim to publish the  
37  
38 findings in a peer-reviewed journal and present the results at national and international  
39  
40 conferences. A summary of findings will be provided to participants, a local kidney patient  
41  
42 charity and the funding body.  
43  
44  
45  
46  
47  
48  
49  
50  
51  
52  
53  
54  
55  
56  
57  
58  
59  
60

## DISCUSSION

To our knowledge, the EX-FRAIL CKD trial is the first pilot RCT of a progressive home-based exercise intervention specifically designed for pre-frail and frail older adults with CKD. Given the uncertainties around recruitment rates, intervention adherence and outcome measure acceptability, it is necessary to perform a pilot study prior to proceeding with a full-scale trial. These uncertainties have been considered during study design, though amendments may be required to maximise the success of a multi-centre RCT.

This study's strengths include the use of a validated frailty screening measure [28] to assist participant recruitment and, during baseline assessment, the use of the reference standard for diagnosing physical frailty, i.e. the FP [2], to determine suitability for randomisation. This methodology will minimise the number of robust individuals approached for study consent and ensure that only pre-frail and frail participants receive the intervention, thereby strengthening any conclusions that can be made following study completion. Furthermore, the nested qualitative study will complement quantitative data analysis by exploring the acceptability of the randomisation procedures, outcome measures and intervention, thus identifying areas for adaptation in a definitive RCT. An acknowledged limitation is that semi-structured interviews will be completed by a researcher involved in delivery of the study intervention, which may influence participant responses. However, the participants will be encouraged to give honest responses by reinforcing that the study objectives include to explore the acceptability of the study and identify areas requiring adaptation for a definitive RCT.

1  
2  
3 Home-based exercise programmes have been performed safely in frail older adults [23],  
4  
5 however, perceived safety concerns (e.g. fall concerns) may influence participant adherence  
6  
7 to the exercise programme. Participants randomised to the intervention arm receive  
8  
9 exercise education from a physiotherapist experienced in exercise prescription. Moreover,  
10  
11 the exercise programme is delivered in a graded and progressive manner with the use of  
12  
13 weekly telephone calls that ensure safe exercise practices, explore participant uncertainties  
14  
15 and provide ongoing support. We hope that the above will minimise participant concerns,  
16  
17 therefore maximising participant adherence to the exercise programme.  
18  
19  
20  
21  
22  
23  
24

25 The EX-FRAIL CKD trial aims to inform the design of a definitive multi-centre RCT that  
26  
27 explores the benefits of a progressive, multi-component home-based exercise programme.  
28  
29 If a definitive RCT demonstrates improvements in the physical function of participants,  
30  
31 associated improvements in mobility, fall concern, independence, symptom-burden and  
32  
33 HRQOL are anticipated, supporting the case for a home-based exercise programme within  
34  
35 routine clinical care.  
36  
37  
38  
39  
40  
41  
42  
43  
44  
45  
46  
47  
48  
49  
50  
51  
52  
53  
54  
55  
56  
57  
58  
59  
60

**REFERENCES**

1. Clegg A, Young J, Iliffe S, Rikkert MO, Rockwood K. Frailty in elderly people. *Lancet* (London, England). 2013 Mar 02;381(9868):752-62.
2. Fried LP, Tangen CM, Walston J, Newman AB, Hirsch C, Gottdiener J, et al. Frailty in older adults: evidence for a phenotype. *J Gerontol A Biol Sci Med Sci*. 2001 Mar;56(3):M146-56.
3. Nixon AC, Bampouras TM, Pendleton N, Woywodt A, Mitra S, Dhaygude A. Frailty and chronic kidney disease: current evidence and continuing uncertainties. *Clin Kidney J*. 2018 Apr;11(2):236-45.
4. Collard RM, Boter H, Schoevers RA, Oude Voshaar RC. Prevalence of frailty in community-dwelling older persons: a systematic review. *J Am Geriatr Soc*. 2012 Aug;60(8):1487-92.
5. Chowdhury R, Peel NM, Krosch M, Hubbard RE. Frailty and chronic kidney disease: A systematic review. *Arch Gerontol Geriatr*. 2016 Oct 22;68:135-42.
6. Iyasere OU, Brown EA, Johansson L, Huson L, Smee J, Maxwell AP, et al. Quality of Life and Physical Function in Older Patients on Dialysis: A Comparison of Assisted Peritoneal Dialysis with Hemodialysis. *Clin J Am Soc Nephrol*. 2016 Mar 7;11(3):423-30.
7. Nixon AC, Bampouras TM, Pendleton N, Mitra S, Brady ME, Dhaygude AP. Frailty is independently associated with worse health-related quality of life in chronic kidney disease: a secondary analysis of the Frailty Assessment in Chronic Kidney Disease study. *Clinical Kidney Journal*. 2019.

- 1  
2  
3 8. McAdams-DeMarco MA, Suresh S, Law A, Salter ML, Gimenez LF, Jaar BG, et al.  
4  
5 Frailty and falls among adult patients undergoing chronic hemodialysis: a  
6  
7 prospective cohort study. *BMC Nephrol*. 2013 Oct 16;14:224.  
8  
9
- 10 9. Johansen KL, Chertow GM, Jin C, Kutner NG. Significance of frailty among dialysis  
11  
12 patients. *Journal of the American Society of Nephrology : JASN*. 2007  
13  
14 Nov;18(11):2960-7.  
15  
16
- 17 10. Roshanravan B, Khatri M, Robinson-Cohen C, Levin G, Patel KV, de Boer IH, et al. A  
18  
19 prospective study of frailty in nephrology-referred patients with CKD. *American*  
20  
21 *journal of kidney diseases : the official journal of the National Kidney Foundation*.  
22  
23 2012 Dec;60(6):912-21.  
24  
25  
26
- 27 11. McAdams-DeMarco MA, Law A, Salter ML, Boyarsky B, Gimenez L, Jaar BG, et al.  
28  
29 Frailty as a novel predictor of mortality and hospitalization in individuals of all ages  
30  
31 undergoing hemodialysis. *J Am Geriatr Soc*. 2013 Jun;61(6):896-901.  
32  
33  
34
- 35 12. Nixon AC, Bampouras TM, Pendleton N, Woywodt A, Mitra S, Dhaygude A. Frailty  
36  
37 and chronic kidney disease: current evidence and continuing uncertainties. *Clinical*  
38  
39 *Kidney Journal*. 2017.  
40  
41
- 42 13. Johansen KL, Chertow GM, Kutner NG, Dalrymple LS, Grimes BA, Kaysen GA. Low  
43  
44 level of self-reported physical activity in ambulatory patients new to dialysis. *Kidney*  
45  
46 *Int*. 2010 Dec;78(11):1164-70.  
47  
48
- 49 14. John SG, Sigrist MK, Taal MW, McIntyre CW. Natural history of skeletal muscle mass  
50  
51 changes in chronic kidney disease stage 4 and 5 patients: an observational study.  
52  
53 *PloS one*. 2013;8(5):e65372.  
54  
55  
56
- 57 15. Heiwe S, Jacobson SH. Exercise training for adults with chronic kidney disease. *The*  
58  
59 *Cochrane database of systematic reviews*. 2011 Oct 05(10):Cd003236.  
60

- 1  
2  
3 16. Heiwe S, Jacobson SH. Exercise training in adults with CKD: a systematic review and  
4 meta-analysis. *American journal of kidney diseases : the official journal of the*  
5  
6  
7  
8  
9  
10  
11 17. Ferrucci L, Guralnik JM, Studenski S, Fried LP, Cutler GB, Jr., Walston JD. Designing  
12  
13  
14  
15  
16  
17  
18  
19  
20  
21 18. McMurdo ME, Roberts H, Parker S, Wyatt N, May H, Goodman C, et al. Improving  
22  
23  
24  
25  
26  
27  
28 19. de Labra C, Guimaraes-Pinheiro C, Maseda A, Lorenzo T, Millan-Calenti JC. Effects of  
29  
30  
31  
32  
33  
34  
35 20. Brown SA, Tyrer FC, Clarke AL, Lloyd-Davies LH, Stein AG, Tarrant C, et al. Symptom  
36  
37  
38  
39  
40  
41  
42  
43 21. Khan SS, Kazmi WH, Abichandani R, Tighiouart H, Pereira BJ, Kausz AT. Health care  
44  
45  
46  
47  
48  
49  
50 22. Ashworth NL, Chad KE, Harrison EL, Reeder BA, Marshall SC. Home versus center  
51  
52  
53  
54  
55  
56  
57  
58  
59  
60

- 1  
2  
3 23. Clegg AP, Barber SE, Young JB, Forster A, Iliffe SJ. Do home-based exercise  
4 interventions improve outcomes for frail older people? Findings from a systematic  
5 review. *Rev Clin Gerontol*. 2012 Feb;22(1):68-78.  
6  
7
- 8  
9  
10 24. Craig P, Dieppe P, Macintyre S, Michie S, Nazareth I, Petticrew M. Developing and  
11 evaluating complex interventions: the new Medical Research Council guidance. *BMJ*  
12 (Clinical research ed). 2008 Sep 29;337:a1655.  
13  
14
- 15 25. Chan A-W, Tetzlaff JM, Altman DG, Laupacis A, Gøtzsche PC, Krleža-Jerić K, et al.  
16 SPIRIT 2013 statement: defining standard protocol items for clinical trials. *Annals of*  
17 *internal medicine*. 2013;158(3):200-07.  
18  
19
- 20 26. Chan A-W, Tetzlaff JM, Gøtzsche PC, Altman DG, Mann H, Berlin JA, et al. SPIRIT 2013  
21 explanation and elaboration: guidance for protocols of clinical trials. *BMJ (Clinical*  
22 *research ed)*. 2013;346:e7586-e86.  
23  
24
- 25 27. Rockwood K, Song X, MacKnight C, Bergman H, Hogan DB, McDowell I, et al. A global  
26 clinical measure of fitness and frailty in elderly people. *Cmaj*. 2005 Aug  
27 30;173(5):489-95.  
28  
29
- 30 28. Nixon AC, Bampouras TM, Pendleton N, Mitra S, Dhaygude AP. Diagnostic Accuracy  
31 of Frailty Screening Methods in Advanced Chronic Kidney Disease. *Nephron*.  
32 2019;141(3):147-55.  
33  
34
- 35 29. Pescatello L, Arena R, Riebe D, Thompson P. Exercise Prescription for Patients with  
36 Cardiovascular and Cerebrovascular Disease. *American College of Sports Medicine's*  
37 *Guidelines for Exercise Testing and Prescription*. 2013. p. 236-59.  
38  
39
- 40 30. Julious SA. Sample size of 12 per group rule of thumb for a pilot study.  
41 *Pharmaceutical Statistics*. 2005;4(4):287-91.  
42  
43  
44  
45  
46  
47  
48  
49  
50  
51  
52  
53  
54  
55  
56  
57  
58  
59  
60

- 1  
2  
3 31. Whitehead AL, Julious SA, Cooper CL, Campbell MJ. Estimating the sample size for a  
4 pilot randomised trial to minimise the overall trial sample size for the external pilot  
5 and main trial for a continuous outcome variable. *Statistical methods in medical*  
6  
7  
8  
9  
10  
11  
12 research. 2016 Jun;25(3):1057-73.
- 13 32. Kernan WN, Viscoli CM, Makuch RW, Brass LM, Horwitz RI. Stratified randomization  
14  
15  
16  
17 for clinical trials. *Journal of clinical epidemiology*. 1999 Jan;52(1):19-26.
- 18 33. Theou O, Stathokostas L, Roland KP, Jakobi JM, Patterson C, Vandervoort AA, et al.  
19  
20  
21  
22  
23  
24  
25  
26  
27  
28  
29  
30  
31  
32  
33  
34  
35  
36  
37  
38  
39  
40  
41  
42  
43  
44  
45  
46  
47  
48  
49  
50  
51  
52  
53  
54  
55  
56  
57  
58  
59  
60  
The effectiveness of exercise interventions for the management of frailty: a  
systematic review. *Journal of aging research*. 2011 Apr 04;2011:569194.
34. de Vries NM, van Ravensberg CD, Hobbelen JS, Olde Rikkert MG, Staal JB, Nijhuis-van  
der Sanden MW. Effects of physical exercise therapy on mobility, physical  
functioning, physical activity and quality of life in community-dwelling older adults  
with impaired mobility, physical disability and/or multi-morbidity: a meta-analysis.  
*Ageing Res Rev*. 2012 Jan;11(1):136-49.
35. Gillespie LD, Robertson MC, Gillespie WJ, Sherrington C, Gates S, Clemson LM, et al.  
Interventions for preventing falls in older people living in the community. *Cochrane*  
*Database Syst Rev*. 2012 Sep 12(9):Cd007146.
36. Nelson ME, Rejeski WJ, Blair SN, Duncan PW, Judge JO, King AC, et al. Physical  
activity and public health in older adults: recommendation from the American  
College of Sports Medicine and the American Heart Association. *Circulation*. 2007  
Aug 28;116(9):1094-105.
37. Borg G. Perceived exertion as an indicator of somatic stress. *Scandinavian journal of*  
*rehabilitation medicine*. 1970;2(2):92-8.



- 1  
2  
3 38. Hoffmann TC, Glasziou PP, Boutron I, Milne R, Perera R, Moher D, et al. Better  
4 reporting of interventions: template for intervention description and replication  
5 (TIDieR) checklist and guide. *BMJ (Clinical research ed)*. 2014 Mar 7;348:g1687.  
6  
7  
8  
9  
10 39. Eldridge SM, Chan CL, Campbell MJ, Bond CM, Hopewell S, Thabane L, et al.  
11 CONSORT 2010 statement: extension to randomised pilot and feasibility trials. *BMJ*  
12  
13 (Clinical research ed). 2016 Oct 24;355:i5239.  
14  
15  
16  
17 40. Avery KN, Williamson PR, Gamble C, O'Connell Francischetto E, Metcalfe C, Davidson  
18 P, et al. Informing efficient randomised controlled trials: exploration of challenges in  
19  
20 developing progression criteria for internal pilot studies. *BMJ open*. 2017 Feb  
21  
22 17;7(2):e013537.  
23  
24  
25  
26  
27 41. Roshanravan B, Robinson-Cohen C, Patel KV, Ayers E, Littman AJ, de Boer IH, et al.  
28 Association between physical performance and all-cause mortality in CKD. *Journal of*  
29  
30 the American Society of Nephrology : JASN. 2013 Apr;24(5):822-30.  
31  
32  
33  
34 42. Perera S, Mody SH, Woodman RC, Studenski SA. Meaningful change and  
35  
36 responsiveness in common physical performance measures in older adults. *J Am*  
37  
38 *Geriatr Soc*. 2006 May;54(5):743-9.  
39  
40  
41  
42 43. Kwon S, Perera S, Pahor M, Katula JA, King AC, Groessl EJ, et al. What is a meaningful  
43  
44 change in physical performance? Findings from a clinical trial in older adults (the  
45  
46 LIFE-P study). *J Nutr Health Aging*. 2009 Jun;13(6):538-44.  
47  
48  
49 44. Guralnik JM, Simonsick EM, Ferrucci L, Glynn RJ, Berkman LF, Blazer DG, et al. A short  
50  
51 physical performance battery assessing lower extremity function: association with  
52  
53 self-reported disability and prediction of mortality and nursing home admission.  
54  
55 *Journal of gerontology*. 1994 Mar;49(2):M85-94.  
56  
57  
58  
59  
60

- 1  
2  
3 45. MacKinnon HJ, Wilkinson TJ, Clarke AL, Gould DW, O'Sullivan TF, Xenophontos S, et  
4  
5 al. The association of physical function and physical activity with all-cause mortality  
6  
7 and adverse clinical outcomes in nondialysis chronic kidney disease: a systematic  
8  
9 review. *Therapeutic Advances in Chronic Disease*. 2018.
- 10  
11  
12  
13 46. McAdams-DeMarco MA, Isaacs K, Darko L, Salter ML, Gupta N, King EA, et al.  
14  
15 Changes in Frailty After Kidney Transplantation. *J Am Geriatr Soc*. 2015  
16  
17 Oct;63(10):2152-7.
- 18  
19  
20 47. Mahoney FI, Barthel DW. FUNCTIONAL EVALUATION: THE BARTHEL INDEX. Maryland  
21  
22 state medical journal. 1965 Feb;14:61-5.
- 23  
24  
25 48. Yardley L, Beyer N, Hauer K, Kempen G, Piot-Ziegler C, Todd C. Development and  
26  
27 initial validation of the Falls Efficacy Scale-International (FES-I). *Age Ageing*. 2005  
28  
29 Nov;34(6):614-9.
- 30  
31  
32 49. Delbaere K, Close JC, Mikolaizak AS, Sachdev PS, Brodaty H, Lord SR. The Falls  
33  
34 Efficacy Scale International (FES-I). A comprehensive longitudinal validation study.  
35  
36 *Age Ageing*. 2010 Mar;39(2):210-6.
- 37  
38  
39 50. Murphy EL, Murtagh FE, Carey I, Sheerin NS. Understanding symptoms in patients  
40  
41 with advanced chronic kidney disease managed without dialysis: use of a short  
42  
43 patient-completed assessment tool. *Nephron Clin Pract*. 2009;111(1):c74-80.
- 44  
45  
46 51. Ware J, Jr., Kosinski M, Keller SD. A 12-Item Short-Form Health Survey: construction  
47  
48 of scales and preliminary tests of reliability and validity. *Medical care*. 1996  
49  
50 Mar;34(3):220-33.
- 51  
52  
53 52. Lacson E, Jr., Xu J, Lin SF, Dean SG, Lazarus JM, Hakim RM. A comparison of SF-36 and  
54  
55 SF-12 composite scores and subsequent hospitalization and mortality risks in long-  
56  
57 term dialysis patients. *Clin J Am Soc Nephrol*. 2010 Feb;5(2):252-60.
- 58  
59  
60

- 1  
2  
3 53. Maruish ME (Ed). User's manual for the SF-12v2 Health Survey (3rd ed.). Lincoln, RI:  
4  
5 QualityMetric Incorporated. 2012.  
6  
7  
8 54. Braun V, Clarke V. Using thematic analysis in psychology. *Qualitative Research in*  
9  
10 *Psychology*. 2006;3(2):77-101.  
11  
12  
13 55. Taylor HL, Jacobs DR, Jr., Schucker B, Knudsen J, Leon AS, Debacker G. A  
14  
15 questionnaire for the assessment of leisure time physical activities. *Journal of*  
16  
17 *chronic diseases*. 1978;31(12):741-55.  
18  
19  
20 56. Orme JG, Reis J, Herz EJ. Factorial and discriminant validity of the Center for  
21  
22 *Epidemiological Studies Depression (CES-D) scale*. *Journal of clinical psychology*.  
23  
24 1986 Jan;42(1):28-33.  
25  
26  
27  
28  
29  
30  
31  
32  
33  
34  
35  
36  
37  
38  
39  
40  
41  
42  
43  
44  
45  
46  
47  
48  
49  
50  
51  
52  
53  
54  
55  
56  
57  
58  
59  
60

## TABLES

**Table 1. The Frailty Phenotype.**

| Frailty Phenotype Component                                                           | Measure                                                                                                                                                                                                                                                                                                                                                                                                                                                                                                                  |
|---------------------------------------------------------------------------------------|--------------------------------------------------------------------------------------------------------------------------------------------------------------------------------------------------------------------------------------------------------------------------------------------------------------------------------------------------------------------------------------------------------------------------------------------------------------------------------------------------------------------------|
| <b>Unintentional Weight Loss</b>                                                      | ≥10 pounds or ≥5% body weight over the preceding 12 months.                                                                                                                                                                                                                                                                                                                                                                                                                                                              |
| <b>Weakness</b>                                                                       | Hand grip strength will be assessed in the seated position with the elbow positioned at 90 degrees, supported by the arm of a chair, and with a hand-grip dynamometer (Takei 5101 GRIP-A dynamometer, Takei Scientific Inst. Co. Ltd., Niigata, Japan) supported by the assessor. Both arms will be examined with the highest score from three efforts from each side used for analysis. The body mass index and gender stratified hand grip strength cut-offs proposed by Fried et al are used to define weakness [2].  |
| <b>Slowness</b>                                                                       | Walking speed (15 feet) will be assessed as outlined in the section titled 'Physical Function'. The height and gender stratified walking speed cut-offs proposed by Fried et al are used to define slowness [2].                                                                                                                                                                                                                                                                                                         |
| <b>Low Physical Activity</b>                                                          | A modified version of the Minnesota Leisure Time Questionnaire [55] will be used to assess physical activity. Low physical activity is defined as <383 kcal/wk for men and <270 kcal/wk for women [2].                                                                                                                                                                                                                                                                                                                   |
| <b>Self-perceived Exhaustion</b>                                                      | The CES-D Scale will be used to assess self-perceived exhaustion [56]. Participants will be read the following statements: (1) I felt that everything I did was an effort. (2) I could not get going. Participants will then be asked, 'How often in the last week did you feel this way?' and provided the following scale: 0 = rarely or none of the time, 1 = some of the time, 2 = moderate amount of the time, 3 = most of the time. Self-perceived exhaustion is defined as an answer ≥2 for either statement [2]. |
| <b>Frailty is diagnosed if 3 or more frailty components are present.</b>              |                                                                                                                                                                                                                                                                                                                                                                                                                                                                                                                          |
| <b>Pre-frailty is diagnosed if 1 or 2 frailty components are present.</b>             |                                                                                                                                                                                                                                                                                                                                                                                                                                                                                                                          |
| kcal/wk, Kilocalories per week; CES-D, Center for Epidemiological Studies Depression. |                                                                                                                                                                                                                                                                                                                                                                                                                                                                                                                          |

**Table 2. Schedule of Assessments**

| Assessment                | Time      |          |           |
|---------------------------|-----------|----------|-----------|
|                           | Screening | Baseline | Follow-Up |
| Clinical Frailty Scale    | X         |          |           |
| Clinical Characteristics  | X         | X        |           |
| Weight, Height, HR, BP    |           | X        | X         |
| Laboratory Variables      | X         | X        |           |
| Frailty Phenotype         |           | X        | X         |
| SPPB                      |           | X        | X         |
| Barthel Index             |           | X        | X         |
| SF-12                     |           | X        | X         |
| FES-I                     |           | X        | X         |
| POS-S RENAL               |           | X        | X         |
| Semi-structured Interview |           |          | X         |

HR, Heart Rate; BP, Blood Pressure; SPPB, Short Physical Performance Battery; SF-12, Short Form-12v2; FES-I, Falls Efficacy Scale-International; POS-S RENAL, Palliative Care Outcome Scale-Symptoms RENAL.

**Table 3. The EX-FRAIL CKD Exercise Programme.**

| Exercise                        | Level 1                            | Level 2                                                | Level 3                                                     | Level 4                           |
|---------------------------------|------------------------------------|--------------------------------------------------------|-------------------------------------------------------------|-----------------------------------|
| <b>1. Walking</b>               | Walk for 1 minute                  | Walk for 2 minutes                                     | Walk for 10 minutes                                         | Walk for 15 minutes               |
| <b>2. Lower leg extension</b>   | Seated leg extension*              | Seated leg raise*                                      | Seated weighted (0.5kg) leg raise*                          | Seated weighted (1kg) leg raise*  |
| <b>3. Bilateral calf raises</b> | Seated calf raises*                | Standing calf raises placing hands on secure surface*  | Standing calf raises placing finger tips on secure surface* | Standing calf raises*             |
| <b>4. Sit to stand</b>          | Sit to stand using arms to assist* | Sit to stand without using arms to assist*             | Sit to stand holding 0.5kg weights*                         | Sit to stand holding 1kg weights* |
| <b>5. Wall/table push up</b>    | Wall push up**                     | Wall push up*                                          | Table push up**                                             | Table push up*                    |
| <b>6. Marching</b>              | Marching whilst seated*            | Marching whilst standing with hands on secure surface* | Marching whilst standing*                                   | Stair step*                       |

\*3 sets of 10 repetitions; \*\*3 sets of 5 repetitions.

**Table 4. TIDier Checklist.**

| Item                                       |                                                                                                                                                                                                                                                                                                                                                  |
|--------------------------------------------|--------------------------------------------------------------------------------------------------------------------------------------------------------------------------------------------------------------------------------------------------------------------------------------------------------------------------------------------------|
| <b>1. Brief name</b>                       | The EX-FRAIL CKD Exercise Programme                                                                                                                                                                                                                                                                                                              |
| <b>2. Rationale</b>                        | Described in 'Introduction' and section titled 'Intervention Development'                                                                                                                                                                                                                                                                        |
| <b>3. Materials</b>                        | Exercise guidebook, exercise diary and wrist/ankle weights.                                                                                                                                                                                                                                                                                      |
| <b>4. Procedures</b>                       | Described in section titled 'Intervention Description' and 'Participant Timeline'.                                                                                                                                                                                                                                                               |
| <b>5. Provider</b>                         | Exercise programme education will be delivered by a physiotherapist experienced in exercise prescription. Weekly telephone calls will be performed by the physiotherapist or specialist trainee with relevant experience.                                                                                                                        |
| <b>6. Modes of delivery</b>                | Face-to-face exercise education session followed by weekly telephone calls.                                                                                                                                                                                                                                                                      |
| <b>7. Location</b>                         | Exercise education sessions will be delivered in a private room at NIHR Lancashire Clinical Research Facility. All exercise sessions will be completed in the participant's own home.                                                                                                                                                            |
| <b>8. Frequency and duration</b>           | All participants will have an exercise education session lasting approximately 60 minutes. Participants will aim to perform three exercise sessions at home per week, lasting approximately 30-45 minutes each.                                                                                                                                  |
| <b>9. Tailoring</b>                        | Initial exercise level will be determined by frailty status, unless the physiotherapist determines otherwise due to safety concerns. An alternative exercise will be provided if a participant is unable to perform a specific exercise as originally intended.                                                                                  |
| <b>10. Modifications</b>                   | Cannot be described until study completion.                                                                                                                                                                                                                                                                                                      |
| <b>11. Adherence and fidelity: planned</b> | Exercises will be delivered as described in the exercise guidebook. If modification is needed, the participant (and study team) will be provided additional documentation. Adherence will be assessed during telephone calls and review of the participant's exercise diary. Outcomes of telephone calls will be discussed to maintain fidelity. |
| <b>12. Adherence and fidelity: actual</b>  | Cannot be described until study completion.                                                                                                                                                                                                                                                                                                      |

NIHR, National Institute of Health Research.

**Table 5. Progression Criteria.**

| <b>Progression Criteria</b>                                                        | <b>Stop/Go Thresholds</b>                                                                          |
|------------------------------------------------------------------------------------|----------------------------------------------------------------------------------------------------|
| <b>Eligibility</b>                                                                 | <b>STOP:</b> <5% of patients eligible<br><b>GO:</b> >10% of patients eligible                      |
| <b>Recruitment</b>                                                                 | <b>STOP:</b> <10% of eligible patients recruited<br><b>GO:</b> >30% of eligible patients recruited |
| <b>Exercise Adherence</b><br><b>(defined as <math>\geq 2</math> sessions/week)</b> | <b>STOP:</b> <30% adherence<br><b>GO:</b> >70% adherence                                           |
| <b>Outcome Measure Completion</b><br><b>(not including lost to follow up)</b>      | <b>STOP:</b> <70% outcome measure completion<br><b>GO:</b> >80% outcome measure completion         |
| <b>Loss to Follow-Up</b><br><b>(including withdrawn and lost)</b>                  | <b>STOP:</b> >50% loss to follow-up<br><b>GO:</b> <25% loss to follow-up                           |

**FIGURE LEGEND**

**Figure 1. Study Flow-Diagram.**



## AUTHORS CONTRIBUTIONS

All authors contributed to the design of the study and writing of the protocol. ACN, TMB, HJG, and HMLY were involved in the development of the EX-FRAIL CKD exercise programme.

## FUNDING STATEMENT

The EX-FRAIL CKD Trial is supported by a grant from Kidney Research UK (IN\_013\_20180306), which has funded equipment costs and HJG's study-related activity. ACN and HJG receive non-financial support from the NIHR Lancashire Clinical Research Facility. HMLY is supported by a grant from the NIHR (DRF-2016-09-015). The views expressed in this publication are those of the authors and not necessarily those of the NHS, the National Institute for Health Research or the Department of Health. The funders had no role in the study design; collection, analysis, and interpretation of the data; writing the report; and the decision to submit the report for publication.

## COMPETING INTERESTS STATEMENT

Unrelated to this body of work, APD has received lecture fees from speaking at the invitation of MSD and received travel support from Pharmacosmos.

**LICENCE STATEMENT**

I, the Submitting Author has the right to grant and does grant on behalf of all authors of the Work (as defined in the below author licence), an exclusive licence and/or a non-exclusive licence for contributions from authors who are: i) UK Crown employees; ii) where BMJ has agreed a CC-BY licence shall apply, and/or iii) in accordance with the terms applicable for US Federal Government officers or employees acting as part of their official duties; on a worldwide, perpetual, irrevocable, royalty-free basis to BMJ Publishing Group Ltd ("BMJ") its licensees and where the relevant Journal is co-owned by BMJ to the co-owners of the Journal, to publish the Work in BMJ Open and any other BMJ products and to exploit all rights, as set out in our licence.

The Submitting Author accepts and understands that any supply made under these terms is made by BMJ to the Submitting Author unless you are acting as an employee on behalf of your employer or a postgraduate student of an affiliated institution which is paying any applicable article publishing charge ("APC") for Open Access articles. Where the Submitting Author wishes to make the Work available on an Open Access basis (and intends to pay the relevant APC), the terms of reuse of such Open Access shall be governed by a Creative Commons licence – details of these licences and which Creative Commons licence will apply to this Work are set out in our licence referred to above.

1  
2  
3  
4  
5  
6  
7  
8  
9  
10  
11  
12  
13  
14  
15  
16  
17  
18  
19  
20  
21  
22  
23  
24  
25  
26  
27  
28  
29  
30  
31  
32  
33  
34  
35  
36  
37  
38  
39  
40  
41  
42  
43  
44  
45  
46  
47  
48  
49  
50  
51  
52  
53  
54  
55  
56  
57  
58  
59  
60

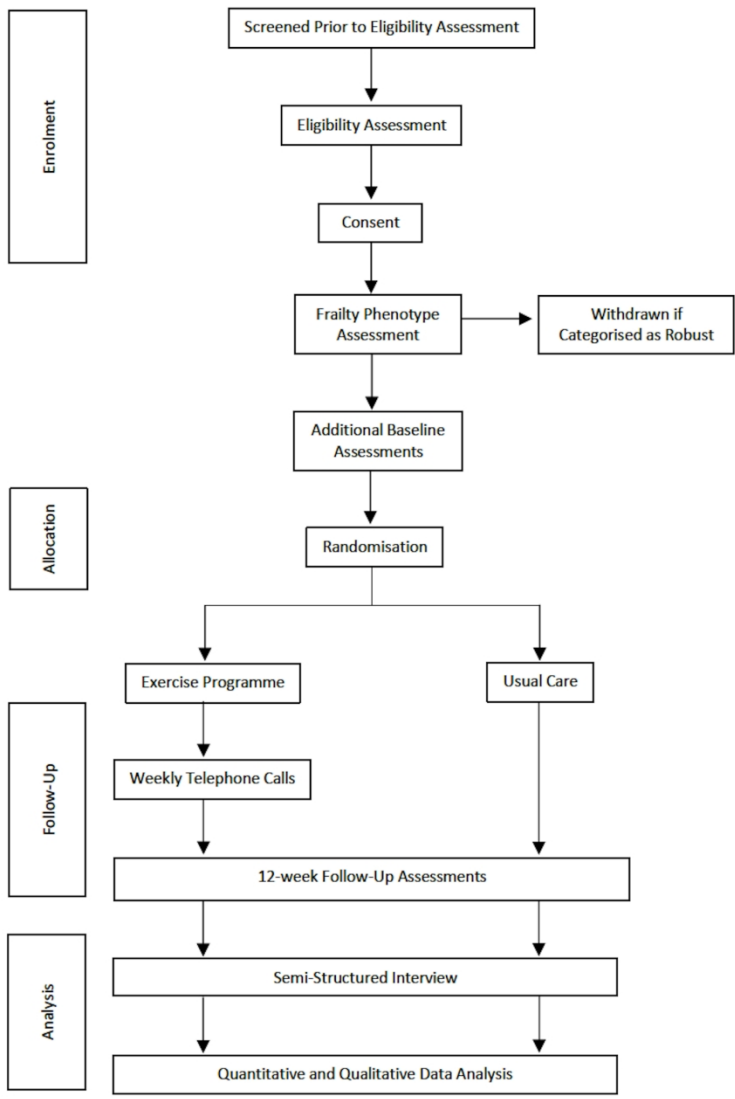

Figure 1. Study Flow-Diagram.

Figure 1. Study Flow-Diagram.

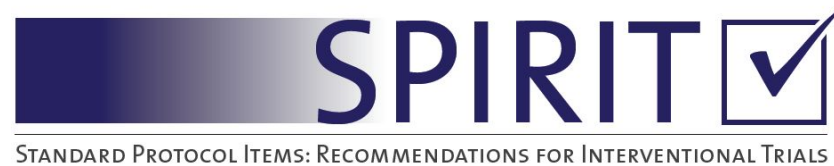

SPIRIT 2013 Checklist: Recommended items to address in a clinical trial protocol and related documents\*

| Section/item                      | Item No | Description                                                                                                                                                                                                                                                                              | Addressed on page number |
|-----------------------------------|---------|------------------------------------------------------------------------------------------------------------------------------------------------------------------------------------------------------------------------------------------------------------------------------------------|--------------------------|
| <b>Administrative information</b> |         |                                                                                                                                                                                                                                                                                          |                          |
| Title                             | 1       | Descriptive title identifying the study design, population, interventions, and, if applicable, trial acronym                                                                                                                                                                             | 1                        |
| Trial registration                | 2a      | Trial identifier and registry name. If not yet registered, name of intended registry                                                                                                                                                                                                     | 1,5                      |
|                                   | 2b      | All items from the World Health Organization Trial Registration Data Set                                                                                                                                                                                                                 | 7-24                     |
| Protocol version                  | 3       | Date and version identifier                                                                                                                                                                                                                                                              | 2                        |
| Funding                           | 4       | Sources and types of financial, material, and other support                                                                                                                                                                                                                              | 38                       |
| Roles and responsibilities        | 5a      | Names, affiliations, and roles of protocol contributors                                                                                                                                                                                                                                  | 1                        |
|                                   | 5b      | Name and contact information for the trial sponsor                                                                                                                                                                                                                                       | 2                        |
|                                   | 5c      | Role of study sponsor and funders, if any, in study design; collection, management, analysis, and interpretation of data; writing of the report; and the decision to submit the report for publication, including whether they will have ultimate authority over any of these activities | 38                       |
|                                   | 5d      | Composition, roles, and responsibilities of the coordinating centre, steering committee, endpoint adjudication committee, data management team, and other individuals or groups overseeing the trial, if applicable (see Item 21a for data monitoring committee)                         | 21                       |

|    |                                                           |     |                                                                                                               |            |
|----|-----------------------------------------------------------|-----|---------------------------------------------------------------------------------------------------------------|------------|
| 1  | <b>Introduction</b>                                       |     |                                                                                                               |            |
| 2  |                                                           |     |                                                                                                               |            |
| 3  | Background and                                            | 6a  | Description of research question and justification for undertaking the trial, including summary of relevant   | 7-9, 13-14 |
| 4  | rationale                                                 |     | studies (published and unpublished) examining benefits and harms for each intervention                        |            |
| 5  |                                                           |     |                                                                                                               |            |
| 6  |                                                           | 6b  | Explanation for choice of comparators                                                                         | 7-9        |
| 7  |                                                           |     |                                                                                                               |            |
| 8  | Objectives                                                | 7   | Specific objectives or hypotheses                                                                             | 9          |
| 9  |                                                           |     |                                                                                                               |            |
| 10 | Trial design                                              | 8   | Description of trial design including type of trial (eg, parallel group, crossover, factorial, single group), |            |
| 11 |                                                           |     | allocation ratio, and framework (eg, superiority, equivalence, noninferiority, exploratory)                   | 10         |
| 12 |                                                           |     |                                                                                                               |            |
| 13 |                                                           |     |                                                                                                               |            |
| 14 | <b>Methods: Participants, interventions, and outcomes</b> |     |                                                                                                               |            |
| 15 |                                                           |     |                                                                                                               |            |
| 16 | Study setting                                             | 9   | Description of study settings (eg, community clinic, academic hospital) and list of countries where data will | 10         |
| 17 |                                                           |     | be collected. Reference to where list of study sites can be obtained                                          |            |
| 18 |                                                           |     |                                                                                                               |            |
| 19 | Eligibility criteria                                      | 10  | Inclusion and exclusion criteria for participants. If applicable, eligibility criteria for study centres and  | 11         |
| 20 |                                                           |     | individuals who will perform the interventions (eg, surgeons, psychotherapists)                               |            |
| 21 |                                                           |     |                                                                                                               |            |
| 22 | Interventions                                             | 11a | Interventions for each group with sufficient detail to allow replication, including how and when they will be | 14-16      |
| 23 |                                                           |     | administered                                                                                                  |            |
| 24 |                                                           |     |                                                                                                               |            |
| 25 |                                                           | 11b | Criteria for discontinuing or modifying allocated interventions for a given trial participant (eg, drug dose  | 14-16      |
| 26 |                                                           |     | change in response to harms, participant request, or improving/worsening disease)                             |            |
| 27 |                                                           |     |                                                                                                               |            |
| 28 |                                                           | 11c | Strategies to improve adherence to intervention protocols, and any procedures for monitoring adherence        | 14-16      |
| 29 |                                                           |     | (eg, drug tablet return, laboratory tests)                                                                    |            |
| 30 |                                                           |     |                                                                                                               |            |
| 31 |                                                           | 11d | Relevant concomitant care and interventions that are permitted or prohibited during the trial                 |            |
| 32 |                                                           |     |                                                                                                               |            |
| 33 | Outcomes                                                  | 12  | Primary, secondary, and other outcomes, including the specific measurement variable (eg, systolic blood       | 16-20      |
| 34 |                                                           |     | pressure), analysis metric (eg, change from baseline, final value, time to event), method of aggregation (eg, |            |
| 35 |                                                           |     | median, proportion), and time point for each outcome. Explanation of the clinical relevance of chosen         |            |
| 36 |                                                           |     | efficacy and harm outcomes is strongly recommended                                                            |            |
| 37 |                                                           |     |                                                                                                               |            |
| 38 | Participant timeline                                      | 13  | Time schedule of enrolment, interventions (including any run-ins and washouts), assessments, and visits for   | 11-12      |
| 39 |                                                           |     | participants. A schematic diagram is highly recommended (see Figure)                                          |            |
| 40 |                                                           |     |                                                                                                               |            |
| 41 |                                                           |     |                                                                                                               |            |
| 42 |                                                           |     |                                                                                                               |            |
| 43 |                                                           |     |                                                                                                               |            |
| 44 |                                                           |     |                                                                                                               |            |
| 45 |                                                           |     |                                                                                                               |            |
| 46 |                                                           |     |                                                                                                               |            |

|   |             |    |                                                                                                                                                                                       |       |
|---|-------------|----|---------------------------------------------------------------------------------------------------------------------------------------------------------------------------------------|-------|
| 1 | Sample size | 14 | Estimated number of participants needed to achieve study objectives and how it was determined, including clinical and statistical assumptions supporting any sample size calculations | 12    |
| 2 |             |    |                                                                                                                                                                                       |       |
| 3 |             |    |                                                                                                                                                                                       |       |
| 4 | Recruitment | 15 | Strategies for achieving adequate participant enrolment to reach target sample size                                                                                                   | 11-12 |
| 5 |             |    |                                                                                                                                                                                       |       |

### 6 **Methods: Assignment of interventions (for controlled trials)**

#### 7 Allocation:

|    |                    |     |                                                                                                                                                                                                                                                                                                                                                          |       |
|----|--------------------|-----|----------------------------------------------------------------------------------------------------------------------------------------------------------------------------------------------------------------------------------------------------------------------------------------------------------------------------------------------------------|-------|
| 8  |                    |     |                                                                                                                                                                                                                                                                                                                                                          |       |
| 9  |                    |     |                                                                                                                                                                                                                                                                                                                                                          |       |
| 10 | Sequence           | 16a | Method of generating the allocation sequence (eg, computer-generated random numbers), and list of any factors for stratification. To reduce predictability of a random sequence, details of any planned restriction (eg, blocking) should be provided in a separate document that is unavailable to those who enrol participants or assign interventions | 12-13 |
| 11 | generation         |     |                                                                                                                                                                                                                                                                                                                                                          |       |
| 12 |                    |     |                                                                                                                                                                                                                                                                                                                                                          |       |
| 13 |                    |     |                                                                                                                                                                                                                                                                                                                                                          |       |
| 14 |                    |     |                                                                                                                                                                                                                                                                                                                                                          |       |
| 15 |                    |     |                                                                                                                                                                                                                                                                                                                                                          |       |
| 16 | Allocation         | 16b | Mechanism of implementing the allocation sequence (eg, central telephone; sequentially numbered, opaque, sealed envelopes), describing any steps to conceal the sequence until interventions are assigned                                                                                                                                                | 12-13 |
| 17 | concealment        |     |                                                                                                                                                                                                                                                                                                                                                          |       |
| 18 | mechanism          |     |                                                                                                                                                                                                                                                                                                                                                          |       |
| 19 |                    |     |                                                                                                                                                                                                                                                                                                                                                          |       |
| 20 | Implementation     | 16c | Who will generate the allocation sequence, who will enrol participants, and who will assign participants to interventions                                                                                                                                                                                                                                | 12-13 |
| 21 |                    |     |                                                                                                                                                                                                                                                                                                                                                          |       |
| 22 |                    |     |                                                                                                                                                                                                                                                                                                                                                          |       |
| 23 |                    |     |                                                                                                                                                                                                                                                                                                                                                          |       |
| 24 | Blinding (masking) | 17a | Who will be blinded after assignment to interventions (eg, trial participants, care providers, outcome assessors, data analysts), and how                                                                                                                                                                                                                | 12-13 |
| 25 |                    |     |                                                                                                                                                                                                                                                                                                                                                          |       |
| 26 |                    |     |                                                                                                                                                                                                                                                                                                                                                          |       |
| 27 |                    | 17b | If blinded, circumstances under which unblinding is permissible, and procedure for revealing a participant's allocated intervention during the trial                                                                                                                                                                                                     | 12-13 |
| 28 |                    |     |                                                                                                                                                                                                                                                                                                                                                          |       |
| 29 |                    |     |                                                                                                                                                                                                                                                                                                                                                          |       |
| 30 |                    |     |                                                                                                                                                                                                                                                                                                                                                          |       |

### 31 **Methods: Data collection, management, and analysis**

|    |                 |     |                                                                                                                                                                                                                                                                                                                                                                                                              |              |
|----|-----------------|-----|--------------------------------------------------------------------------------------------------------------------------------------------------------------------------------------------------------------------------------------------------------------------------------------------------------------------------------------------------------------------------------------------------------------|--------------|
| 32 |                 |     |                                                                                                                                                                                                                                                                                                                                                                                                              |              |
| 33 | Data collection | 18a | Plans for assessment and collection of outcome, baseline, and other trial data, including any related processes to promote data quality (eg, duplicate measurements, training of assessors) and a description of study instruments (eg, questionnaires, laboratory tests) along with their reliability and validity, if known. Reference to where data collection forms can be found, if not in the protocol | 16-20        |
| 34 | methods         |     |                                                                                                                                                                                                                                                                                                                                                                                                              |              |
| 35 |                 |     |                                                                                                                                                                                                                                                                                                                                                                                                              |              |
| 36 |                 |     |                                                                                                                                                                                                                                                                                                                                                                                                              |              |
| 37 |                 |     |                                                                                                                                                                                                                                                                                                                                                                                                              |              |
| 38 |                 |     |                                                                                                                                                                                                                                                                                                                                                                                                              |              |
| 39 |                 | 18b | Plans to promote participant retention and complete follow-up, including list of any outcome data to be collected for participants who discontinue or deviate from intervention protocols                                                                                                                                                                                                                    | 12-13, 16-20 |
| 40 |                 |     |                                                                                                                                                                                                                                                                                                                                                                                                              |              |
| 41 |                 |     |                                                                                                                                                                                                                                                                                                                                                                                                              |              |
| 42 |                 |     |                                                                                                                                                                                                                                                                                                                                                                                                              |              |

1 Data management 19 Plans for data entry, coding, security, and storage, including any related processes to promote data quality 20  
 2 (eg, double data entry; range checks for data values). Reference to where details of data management  
 3 procedures can be found, if not in the protocol  
 4  
 5 Statistical methods 20a Statistical methods for analysing primary and secondary outcomes. Reference to where other details of the 20-21  
 6 statistical analysis plan can be found, if not in the protocol  
 7  
 8 20b Methods for any additional analyses (eg, subgroup and adjusted analyses) 20-21  
 9  
 10 20c Definition of analysis population relating to protocol non-adherence (eg, as randomised analysis), and any  
 11 statistical methods to handle missing data (eg, multiple imputation)  
 12  
 13

14 **Methods: Monitoring**

15  
 16 Data monitoring 21a Composition of data monitoring committee (DMC); summary of its role and reporting structure; statement of 20  
 17 whether it is independent from the sponsor and competing interests; and reference to where further details  
 18 about its charter can be found, if not in the protocol. Alternatively, an explanation of why a DMC is not  
 19 needed  
 20  
 21  
 22 21b Description of any interim analyses and stopping guidelines, including who will have access to these interim 21  
 23 results and make the final decision to terminate the trial  
 24  
 25 Harms 22 Plans for collecting, assessing, reporting, and managing solicited and spontaneously reported adverse 21  
 26 events and other unintended effects of trial interventions or trial conduct  
 27  
 28 Auditing 23 Frequency and procedures for auditing trial conduct, if any, and whether the process will be independent 21-22  
 29 from investigators and the sponsor  
 30  
 31

32 **Ethics and dissemination**

33  
 34 Research ethics 24 Plans for seeking research ethics committee/institutional review board (REC/IRB) approval 21-22  
 35 approval  
 36  
 37 Protocol 25 Plans for communicating important protocol modifications (eg, changes to eligibility criteria, outcomes, 22  
 38 amendments analyses) to relevant parties (eg, investigators, REC/IRBs, trial participants, trial registries, journals,  
 39 regulators)  
 40  
 41  
 42  
 43  
 44  
 45  
 46

|    |                               |     |                                                                                                                                                                                                                                                                                     |    |
|----|-------------------------------|-----|-------------------------------------------------------------------------------------------------------------------------------------------------------------------------------------------------------------------------------------------------------------------------------------|----|
| 1  | Consent or assent             | 26a | Who will obtain informed consent or assent from potential trial participants or authorised surrogates, and how (see Item 32)                                                                                                                                                        | 11 |
| 2  |                               |     |                                                                                                                                                                                                                                                                                     |    |
| 3  |                               |     |                                                                                                                                                                                                                                                                                     |    |
| 4  |                               | 26b | Additional consent provisions for collection and use of participant data and biological specimens in ancillary studies, if applicable                                                                                                                                               |    |
| 5  |                               |     |                                                                                                                                                                                                                                                                                     |    |
| 6  |                               |     |                                                                                                                                                                                                                                                                                     |    |
| 7  | Confidentiality               | 27  | How personal information about potential and enrolled participants will be collected, shared, and maintained in order to protect confidentiality before, during, and after the trial                                                                                                | 20 |
| 8  |                               |     |                                                                                                                                                                                                                                                                                     |    |
| 9  |                               |     |                                                                                                                                                                                                                                                                                     |    |
| 10 | Declaration of interests      | 28  | Financial and other competing interests for principal investigators for the overall trial and each study site                                                                                                                                                                       | 38 |
| 11 |                               |     |                                                                                                                                                                                                                                                                                     |    |
| 12 |                               |     |                                                                                                                                                                                                                                                                                     |    |
| 13 | Access to data                | 29  | Statement of who will have access to the final trial dataset, and disclosure of contractual agreements that limit such access for investigators                                                                                                                                     |    |
| 14 |                               |     |                                                                                                                                                                                                                                                                                     |    |
| 15 |                               |     |                                                                                                                                                                                                                                                                                     |    |
| 16 | Ancillary and post-trial care | 30  | Provisions, if any, for ancillary and post-trial care, and for compensation to those who suffer harm from trial participation                                                                                                                                                       |    |
| 17 |                               |     |                                                                                                                                                                                                                                                                                     |    |
| 18 |                               |     |                                                                                                                                                                                                                                                                                     |    |
| 19 |                               |     |                                                                                                                                                                                                                                                                                     |    |
| 20 | Dissemination policy          | 31a | Plans for investigators and sponsor to communicate trial results to participants, healthcare professionals, the public, and other relevant groups (eg, via publication, reporting in results databases, or other data sharing arrangements), including any publication restrictions | 22 |
| 21 |                               |     |                                                                                                                                                                                                                                                                                     |    |
| 22 |                               |     |                                                                                                                                                                                                                                                                                     |    |
| 23 |                               |     |                                                                                                                                                                                                                                                                                     |    |
| 24 |                               | 31b | Authorship eligibility guidelines and any intended use of professional writers                                                                                                                                                                                                      |    |
| 25 |                               |     |                                                                                                                                                                                                                                                                                     |    |
| 26 |                               | 31c | Plans, if any, for granting public access to the full protocol, participant-level dataset, and statistical code                                                                                                                                                                     | 22 |
| 27 |                               |     |                                                                                                                                                                                                                                                                                     |    |
| 28 |                               |     |                                                                                                                                                                                                                                                                                     |    |
| 29 | <b>Appendices</b>             |     |                                                                                                                                                                                                                                                                                     |    |
| 30 |                               |     |                                                                                                                                                                                                                                                                                     |    |
| 31 | Informed consent materials    | 32  | Model consent form and other related documentation given to participants and authorised surrogates                                                                                                                                                                                  |    |
| 32 |                               |     |                                                                                                                                                                                                                                                                                     |    |
| 33 |                               |     |                                                                                                                                                                                                                                                                                     |    |
| 34 | Biological specimens          | 33  | Plans for collection, laboratory evaluation, and storage of biological specimens for genetic or molecular analysis in the current trial and for future use in ancillary studies, if applicable                                                                                      |    |
| 35 |                               |     |                                                                                                                                                                                                                                                                                     |    |
| 36 |                               |     |                                                                                                                                                                                                                                                                                     |    |

\*It is strongly recommended that this checklist be read in conjunction with the SPIRIT 2013 Explanation & Elaboration for important clarification on the items. Amendments to the protocol should be tracked and dated. The SPIRIT checklist is copyrighted by the SPIRIT Group under the Creative Commons [“Attribution-NonCommercial-NoDerivs 3.0 Unported”](https://creativecommons.org/licenses/by-nc-nd/3.0/) license.



# BMJ Open

## The EX-FRAIL CKD Trial: a study protocol for a pilot randomised controlled trial of a home-based EXercise programme for pre-FRAIL and FRAIL, older adults with Chronic Kidney Disease

|                                 |                                                                                                                                                                                                                                                                                                                                                                                                                                                                                                                                                                                                                                                                                                                                                                                                                                                                                                                                                                                                                                                                                                                                                                                                                                                            |
|---------------------------------|------------------------------------------------------------------------------------------------------------------------------------------------------------------------------------------------------------------------------------------------------------------------------------------------------------------------------------------------------------------------------------------------------------------------------------------------------------------------------------------------------------------------------------------------------------------------------------------------------------------------------------------------------------------------------------------------------------------------------------------------------------------------------------------------------------------------------------------------------------------------------------------------------------------------------------------------------------------------------------------------------------------------------------------------------------------------------------------------------------------------------------------------------------------------------------------------------------------------------------------------------------|
| Journal:                        | <i>BMJ Open</i>                                                                                                                                                                                                                                                                                                                                                                                                                                                                                                                                                                                                                                                                                                                                                                                                                                                                                                                                                                                                                                                                                                                                                                                                                                            |
| Manuscript ID                   | bmjopen-2019-035344.R1                                                                                                                                                                                                                                                                                                                                                                                                                                                                                                                                                                                                                                                                                                                                                                                                                                                                                                                                                                                                                                                                                                                                                                                                                                     |
| Article Type:                   | Protocol                                                                                                                                                                                                                                                                                                                                                                                                                                                                                                                                                                                                                                                                                                                                                                                                                                                                                                                                                                                                                                                                                                                                                                                                                                                   |
| Date Submitted by the Author:   | 04-Mar-2020                                                                                                                                                                                                                                                                                                                                                                                                                                                                                                                                                                                                                                                                                                                                                                                                                                                                                                                                                                                                                                                                                                                                                                                                                                                |
| Complete List of Authors:       | Nixon, Andrew; Lancashire Teaching Hospitals NHS Foundation Trust, Department of Renal Medicine; The University of Manchester, Division of Cardiovascular Sciences<br>Bampouras, Theodoros ; Lancaster University Lancaster Medical School; Lancaster University, The Centre for Ageing Research<br>Gooch, Helen ; NIHR Lancashire Clinical Research Facility, Centre for Health Research and Innovation; Lancashire Teaching Hospitals NHS Foundation Trust, Core Therapies Department<br>Young, Hannah; University of Leicester, Department of Respiratory Sciences; University Hospitals of Leicester NHS Trust, John Walls Renal Unit<br>Finlayson, Kenneth; University of Central Lancashire, Research in Childbirth and Health Unit<br>Pendleton, Neil; The University of Manchester, Division of Neuroscience and Experimental Psychology<br>Mitra, Sandip; The University of Manchester, Manchester Academy of Health Sciences Centre; National Institute of Health Research MedTech & In-vitro Diagnostics Co-operative, Devices for Dignity<br>Brady, Mark; Lancashire Teaching Hospitals NHS Foundation Trust, Department of Renal Medicine<br>Dhaygude, Ajay; Lancashire Teaching Hospitals NHS Foundation Trust, Department of Renal Medicine |
| <b>Primary Subject Heading</b>: | Renal medicine                                                                                                                                                                                                                                                                                                                                                                                                                                                                                                                                                                                                                                                                                                                                                                                                                                                                                                                                                                                                                                                                                                                                                                                                                                             |
| Secondary Subject Heading:      | Geriatric medicine, Sports and exercise medicine, Rehabilitation medicine, Qualitative research, Research methods                                                                                                                                                                                                                                                                                                                                                                                                                                                                                                                                                                                                                                                                                                                                                                                                                                                                                                                                                                                                                                                                                                                                          |
| Keywords:                       | Adult nephrology < NEPHROLOGY, Chronic renal failure < NEPHROLOGY, End stage renal failure < NEPHROLOGY, GERIATRIC MEDICINE                                                                                                                                                                                                                                                                                                                                                                                                                                                                                                                                                                                                                                                                                                                                                                                                                                                                                                                                                                                                                                                                                                                                |
|                                 |                                                                                                                                                                                                                                                                                                                                                                                                                                                                                                                                                                                                                                                                                                                                                                                                                                                                                                                                                                                                                                                                                                                                                                                                                                                            |

SCHOLARONE™  
Manuscripts

1  
2  
3  
4  
5  
6  
7  
8  
9  
10  
11  
12  
13  
14  
15  
16  
17  
18  
19  
20  
21  
22  
23  
24  
25  
26  
27  
28  
29  
30  
31  
32  
33  
34  
35  
36  
37  
38  
39  
40  
41  
42  
43  
44  
45  
46  
47  
48  
49  
50  
51  
52  
53  
54  
55  
56  
57  
58  
59  
60

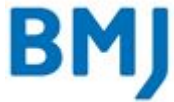

I, the Submitting Author has the right to grant and does grant on behalf of all authors of the Work (as defined in the below author licence), an exclusive licence and/or a non-exclusive licence for contributions from authors who are: i) UK Crown employees; ii) where BMJ has agreed a CC-BY licence shall apply, and/or iii) in accordance with the terms applicable for US Federal Government officers or employees acting as part of their official duties; on a worldwide, perpetual, irrevocable, royalty-free basis to BMJ Publishing Group Ltd ("BMJ") its licensees and where the relevant Journal is co-owned by BMJ to the co-owners of the Journal, to publish the Work in this journal and any other BMJ products and to exploit all rights, as set out in our [licence](#).

The Submitting Author accepts and understands that any supply made under these terms is made by BMJ to the Submitting Author unless you are acting as an employee on behalf of your employer or a postgraduate student of an affiliated institution which is paying any applicable article publishing charge ("APC") for Open Access articles. Where the Submitting Author wishes to make the Work available on an Open Access basis (and intends to pay the relevant APC), the terms of reuse of such Open Access shall be governed by a Creative Commons licence – details of these licences and which [Creative Commons](#) licence will apply to this Work are set out in our licence referred to above.

Other than as permitted in any relevant BMJ Author's Self Archiving Policies, I confirm this Work has not been accepted for publication elsewhere, is not being considered for publication elsewhere and does not duplicate material already published. I confirm all authors consent to publication of this Work and authorise the granting of this licence.

1  
2  
3  
4  
5  
6  
7  
8  
9  
10  
11  
12  
13  
14  
15  
16  
17

# The EX-FRAIL CKD Trial: a study protocol for a pilot randomised controlled trial of a home-based EXercise programme for pre-FRAIL and FRAIL, older adults with Chronic Kidney Disease

18 Andrew C. Nixon<sup>1-3</sup>, Theodoros M. Bampouras<sup>4,5</sup>, Helen J. Gooch<sup>3,6</sup>, Hannah M.L. Young<sup>7,8</sup>,  
19  
20 Kenneth W. Finlayson<sup>9</sup>, Neil Pendleton<sup>10</sup>, Sandip Mitra<sup>11,12</sup>, Mark E. Brady<sup>1</sup>, Ajay P.  
21  
22 Dhaygude<sup>1</sup>  
23  
24  
25  
26  
27

28 <sup>1</sup>Department of Renal Medicine, Lancashire Teaching Hospitals NHS Foundation Trust,  
29 Preston, UK, <sup>2</sup>Division of Cardiovascular Sciences, University of Manchester, Manchester,  
30 UK, <sup>3</sup>Centre for Health Research and Innovation, National Institute of Health Research  
31 Lancashire Clinical Research Facility, Lancashire Teaching Hospitals NHS Foundation Trust,  
32 Preston, UK, <sup>4</sup>Lancaster Medical School, Lancaster University, Lancaster, UK, <sup>5</sup>The Centre for  
33 Ageing Research, Lancaster University, Lancaster, UK, <sup>6</sup>Core Therapies Department,  
34 Lancashire Teaching Hospitals NHS Foundation Trust, Preston, UK, <sup>7</sup>Department of  
35 Respiratory Sciences, University of Leicester, Leicester, UK, <sup>8</sup>John Walls Renal Unit,  
36 University Hospitals of Leicester NHS Trust, Leicester, UK, <sup>9</sup>Research in Childbirth and Health  
37 Unit, University of Central Lancashire, Preston, UK, <sup>10</sup>Division of Neuroscience and  
38 Experimental Psychology, University of Manchester, Manchester, UK, <sup>11</sup>Manchester  
39 Academy of Health Sciences Centre, University of Manchester, Manchester, UK, <sup>12</sup>Devices  
40 for Dignity, National Institute of Health Research MedTech & In-vitro Diagnostics Co-  
41 operative, UK.  
42  
43  
44  
45  
46  
47  
48  
49  
50  
51  
52  
53  
54  
55  
56  
57  
58  
59  
60

1  
2  
3 **Corresponding Author:** Dr Andrew C. Nixon, Department of Renal Medicine, Lancashire

4  
5 Teaching Hospitals NHS Foundation Trust, Royal Preston Hospital, Sharoe Green Lane,

6  
7 Preston, PR2 9HT, UK. Phone 0044-1772523748; e-mail: [andrew.nixon@lthtr.nhs.uk](mailto:andrew.nixon@lthtr.nhs.uk)

8  
9  
10  
11  
12  
13 **Study Sponsor:** Dr Kina Bennett (Research Operations Manager), Centre for Health Research

14  
15 and Innovation, NIHR Lancashire Clinical Research Facility, Lancashire Teaching Hospitals

16  
17 NHS Foundation Trust, Royal Preston Hospital, Sharoe Green Lane, Preston, PR2 9HT, UK.

18  
19  
20 Phone 0044-1772524611

21  
22  
23  
24  
25 **Protocol Version:** 1.2 (13/03/2019)

26  
27  
28  
29  
30 **Keywords:** Adult Nephrology, Chronic Renal Failure, End Stage Renal Failure, Geriatric

31  
32  
33  
34  
35  
36  
37  
38  
39  
40  
41  
42  
43  
44  
45  
46  
47  
48  
49  
50  
51  
52  
53  
54  
55  
56  
57  
58  
59  
60  
Medicine.

**List of Abbreviations**

|             |                                                    |
|-------------|----------------------------------------------------|
| CKD         | Chronic Kidney Disease                             |
| FES-I       | Falls Efficacy Scale-International                 |
| FP          | Frailty Phenotype                                  |
| HRQOL       | Health-Related Quality of Life                     |
| LTHTR       | Lancashire Teaching Hospitals NHS Foundation Trust |
| MRC         | Medical Research Council                           |
| NHS         | National Health Service                            |
| NIHR        | National Institute of Health Research              |
| POS-S RENAL | Palliative Care Outcome Scale-Symptoms RENAL       |
| RCT         | Randomised Controlled Trial                        |
| SF-12       | Short Form-12v2                                    |
| SPPB        | Short Physical Performance Battery                 |

## ABSTRACT

### Introduction

Frailty is highly prevalent in adults with chronic kidney disease (CKD) and is associated with adverse health outcomes including falls, poorer health-related quality of life (HRQOL), hospitalisation and mortality. Low physical activity and muscle wasting are important contributors to physical frailty in adults with CKD. Exercise training may improve physical function and frailty status leading to associated improvements in health outcomes, including HRQOL. The EX-FRAIL CKD trial aims to inform the design of a definitive randomised controlled trial (RCT) that investigates the effectiveness of a progressive, multi-component home-based exercise programme in pre-frail and frail older adults with CKD.

### Methods and Analysis

The EX-FRAIL CKD trial is a two-arm parallel group pilot RCT. Participants categorised as pre-frail or frail, following Frailty Phenotype assessment, will be randomised to receive exercise or usual care. Participants randomised to the intervention arm will receive a tailored 12-week exercise programme, which includes weekly telephone calls to advise on exercise progression. Primary feasibility outcome measures include rate of recruitment, intervention adherence, outcome measure completion and participant attrition. Semi-structured interviews with a purposively selected group of participants will inform the feasibility of the randomisation procedures, outcome measures and intervention. Secondary outcome measures include physical function (walking speed and Short Physical Performance Battery), frailty status (Frailty Phenotype), fall concern (Falls Efficacy Scale-International tool), activities of daily living (Barthel Index), symptom-burden (Palliative Care Outcome Scale-Symptoms RENAL) and HRQOL (Short Form-12v2).

## Ethics and Dissemination

Ethical approval was granted by a National Health Service (NHS) Regional Ethics Committee and the NHS Health Research Authority. The study team aim to publish findings in a peer-reviewed journal and present the results at relevant national and international conferences.

A summary of findings will be provided to participants, a local kidney patient charity and the funding body.

**Trial Registration:** ISRCTN87708989.

For peer review only



### STRENGTHS AND LIMITATIONS OF THIS STUDY

- A validated frailty assessment will be used to determine suitability for randomisation ensuring that only pre-frail and frail participants receive the intervention.
- The exercise programme is delivered in a graded and progressive manner with the use of weekly participant telephone calls to review progress.
- A nested qualitative study will explore the acceptability of the randomisation procedures, outcome measures and intervention to participants.
- Semi-structured interviews will be completed by a researcher involved in delivery of the study intervention.
- Patients that decline study enrolment will not be offered the opportunity to participate in the qualitative study.

## INTRODUCTION

Frailty is the consequence of a cumulative decline in multiple physiological systems associated with ageing [1]. This results in a state of increased vulnerability to disproportionate changes in health status when exposed to seemingly minor insults, such as an infection or fall [1]. Frailty, and its precursor pre-frailty, are associated with an increased risk of falls, hospitalisation, worsening disability and death [2]. The pathophysiological process inherent to chronic kidney disease (CKD), including, though not limited to, uraemia, anabolic hormone dysregulation, increased inflammatory burden, metabolic acidosis and cellular senescence, appear to hasten the decline from fitness to frailty [3]. This is to such an extent that the prevalence of frailty in CKD, particularly by the time of dialysis initiation, is considerably greater than in the community-dwelling older adult population [4,5].

Importantly, as in the general older population, patients with CKD and frailty have worse outcomes than their non-frail counterparts. Frailty is independently linked with adverse clinical outcomes in all stages of CKD, including an increased risk of worse health-related quality of life (HRQOL) [6,7], falls [8], hospitalisation and mortality [9-11].

Low physical activity and associated muscle wasting are important contributors to physical frailty [3]. Physical activity is low in patients with advanced CKD [12] and muscle wasting is pronounced prior to the commencement of dialysis [13]. Increased physical activity levels in those with CKD and pre-frailty/frailty may mitigate this muscle wasting. Exercise training has been shown to improve physical fitness and HRQOL in CKD populations [14,15]. However, patients living with frailty are typically poorly represented in interventional studies, often due to concerns that drop-out rates, adverse events or intervention tolerability may be affected [16,17]. Studies that have explored the use of exercise training in frail older adults

1  
2  
3 have demonstrated benefits in terms of ‘falls, mobility, balance, functional ability, muscle  
4 strength and body composition’ [18]. However, the optimum exercise programme has not  
5  
6 been established [18]. Regardless, exercise programmes that are effective for frail older  
7  
8 adults may not meet the needs of patients living with frailty and CKD, who are more likely to  
9  
10 be frail at a younger age [10], report considerable symptom burden [19] and have high  
11  
12 health care utilisation [20].  
13  
14  
15  
16

17  
18  
19  
20 Many exercise programmes used in studies involving participants with CKD have been  
21  
22 performed under supervision within hospital or other facilities [14,15], circumstances that  
23  
24 can be challenging to implement in clinical practice considering financial and staffing  
25  
26 constraints. Furthermore, travel for exercise sessions may be onerous for frail individuals  
27  
28 with CKD who often report higher levels of fatigue [6]. Home-based exercise programmes  
29  
30 may be less burdensome and more convenient, allowing patients to incorporate physical  
31  
32 activity into their daily lives leading to longer term adoption and maintenance of increased  
33  
34 physical activity [21]. There is evidence in the gerontology literature that home-based  
35  
36 exercise interventions may improve disability in older people with frailty [22]. However,  
37  
38 research is needed to evaluate the benefits of a pragmatic, progressive home-based  
39  
40 exercise programme tailored to the needs of people living with frailty and CKD.  
41  
42  
43  
44  
45  
46  
47  
48

49 As recommended by the Medical Research Council (MRC) guidance for developing and  
50  
51 evaluating complex interventions [23], pilot studies should be used to address key  
52  
53 uncertainties prior to the definitive evaluation of complex interventions. Given the  
54  
55 uncertainties previously described, a pilot randomised controlled trial (RCT) of a home-  
56  
57 based exercise programme for pre-frail and frail older adults with CKD is necessary. This will  
58  
59  
60

1  
2  
3 inform the design of a large-scale RCT that investigates the effect of a home-based exercise  
4  
5 intervention on physical function, frailty status, fall concern, activities of daily living,  
6  
7 symptom-burden and HRQOL in pre-frail and frail older adults with CKD. The 2013 SPIRIT  
8  
9 guidelines [24,25] will be used as the framework for reporting the EX-FRAIL CKD trial  
10  
11  
12  
13 protocol.

## 14 15 16 17 18 **Objectives**

19  
20 A pilot RCT will be performed that aims to:

- 21  
22  
23 1. Evaluate rate of participant recruitment, intervention adherence, outcome measure  
24  
25 completion and attrition.
  - 26  
27  
28 2. Qualitatively explore the acceptability of the randomisation procedure, outcome  
29  
30 measures and, in the intervention arm, a progressive home-based exercise  
31  
32 programme and identify areas requiring adaptation for a definitive RCT.
  - 33  
34  
35 3. Estimate the standard deviation of walking speed in pre-frail and frail patients with  
36  
37  
38 CKD to allow sample size estimation for a definitive RCT.
- 39  
40  
41  
42  
43  
44  
45  
46  
47  
48  
49  
50  
51  
52  
53  
54  
55  
56  
57  
58  
59  
60

## METHODS AND ANALYSIS

### Design

The EX-FRAIL CKD trial is a two-arm parallel group pilot RCT. Outcome assessments will be performed at baseline and 12 weeks' post-randomisation. A nested-qualitative study will be performed following completion of 12-week follow-up visits to explore participant perceptions of the study and, where applicable, the study intervention.

### Study Setting

Participants will be recruited from outpatient clinics at Lancashire Teaching Hospitals NHS Foundation Trust (LTHTR), East Lancashire Teaching Hospitals NHS Trust and Blackpool Teaching Hospitals NHS Foundation Trust. The regional nephrology service operates a 'hub and spoke' model, accordingly participants attending clinics at sites other than LTHTR are still under the care of the LTHTR nephrology service.

### Inclusion Criteria

Patients aged  $\geq 65$  years old with CKD G3b-5 (not receiving dialysis or received a kidney transplant) identified as at least 'vulnerable' using the Clinical Frailty Scale (score  $\geq 4$ ) are eligible for participation [26]. The Clinical Frailty Scale is a 9-point scale that provides definitions for levels of frailty and has good diagnostic accuracy for identifying patients with advanced CKD at risk of frailty [26,27]. It has been adopted as a frailty screening measure within usual care at LTHTR and is used by clinicians and clinical nurse specialists in outpatient clinics. Using a Clinical Frailty Scale score  $\geq 4$  within the inclusion criteria will maximise the likelihood of pre-frail and frail patients being approached for study involvement. Patients must also be able to give informed consent.

## Exclusion Criteria

1. In accordance with the American College of Sport's Medicine [28]:
  - Unstable Angina or recent (within the last 3 months) myocardial infarction.
  - Uncontrolled arrhythmias.
  - Persistent uncontrolled hypertension (systolic blood pressure >180 mmHg or diastolic blood pressure >110 mmHg).
2. Recent (within the last 3 months) stroke or transient ischaemic attack.
3. Registered blind.
4. Unable to mobilise independently.
5. Receiving palliative care for advanced terminal cancer.
6. Recently (within the last 12 months) enrolled in a structured exercise programme (e.g. cardiac rehabilitation) prescribed by a health professional.
7. Anticipated to commence dialysis or receive a renal transplant within the next 3 months.
8. Insufficient understanding of the English language to complete study questionnaires or follow advice within the exercise programme guidebook.
9. Clinical and/or research team consider participation in the exercise programme unsafe.

## Timeline

Figure 1 illustrates the participant flow through the study. Patients will be screened by members of the clinical team (based on age, CKD stage and Clinical Frailty Scale score).

Patients aged  $\geq 65$  years with CKD G3b-5 and a Clinical Frailty Scale score  $\geq 4$  will be given a

1  
2  
3 participant information sheet. Patients will then be telephoned to establish if they are  
4  
5 interested in participating and to ensure eligibility. Patients will be offered an appointment  
6  
7 with the Chief Investigator, at least 24 hours following the telephone call, to obtain written  
8  
9 informed consent to participate in the study.  
10  
11  
12  
13  
14

15 Our previous study demonstrated that a Clinical Frailty Scale score  $\geq 4$  had a sensitivity and  
16  
17 specificity for identifying frailty of 1.00 and 0.55, respectively [27]. Given the risk of false  
18  
19 positives, we considered it prudent to perform a more objective frailty assessment to  
20  
21 ensure that only patients with pre-frailty or frailty underwent randomisation. The Frailty  
22  
23 Phenotype (FP) is a well-studied method to diagnose physical frailty in CKD populations  
24  
25 [2,5]. The FP includes 5 components, as detailed in Table 1 [2]. Frailty is diagnosed if an  
26  
27 individual is assessed as having 3 components and pre-frailty if an individual has 1 or 2  
28  
29 components [2]. The FP is not routinely performed in clinical practice and therefore can only  
30  
31 be performed following study consent. Participants will have a FP assessment pre-  
32  
33 randomisation and will be withdrawn from the study if they are categorised as robust (i.e.  
34  
35 not pre-frail or frail). This eventuality will be explained to patients prior to study consent.  
36  
37  
38  
39  
40  
41  
42 Participants categorised as pre-frail or frail will complete all outcome assessments as  
43  
44 detailed in Table 2 and then be randomised to exercise or usual care groups. Follow-up  
45  
46 outcome assessments will be performed 12-weeks post-randomisation. A group of  
47  
48 participants will be invited to participate in semi-structured interviews following 12-week  
49  
50 follow-up assessments (or following a participant's decision to stop the exercise  
51  
52 programme).  
53  
54  
55  
56  
57  
58  
59  
60

## Sample Size

1  
2  
3 We aim to recruit 40 participants to allow for a dropout rate (that includes participants  
4  
5 categorised as robust using the FP) of up to 50% and still provide sufficient data to assess  
6  
7 study feasibility and estimate the standard deviation of walking speed to inform the sample  
8  
9 size calculation for a definitive RCT [18,22,29,30]. Semi-structured interviews will be  
10  
11 conducted with a purposively selected group of participants, from both study arms,  
12  
13 considering age, gender and frailty status. A pragmatic sample size of 12-14 participants will  
14  
15 be recruited to this nested qualitative study.  
16  
17  
18  
19  
20  
21  
22

### 23 **Allocation and Blinding**

24  
25 Participants will be randomised in a 1:1 ratio to either the intervention or usual care. A  
26  
27 central, concealed web-based randomisation process ([www.sealedenvelope.com](http://www.sealedenvelope.com)) will be  
28  
29 performed in blocks of 4. Stratification will be limited to one factor, FP status, leaving 2  
30  
31 strata, i.e. pre-frailty and frailty [31]. This will ensure that both groups contain similar  
32  
33 proportions of pre-frail and frail participants. Participants cannot be blinded to the outcome  
34  
35 of randomisation due to the nature of the intervention. Furthermore, outcome assessors  
36  
37 will not be blinded to the outcome of randomisation as this pilot study does not aim to  
38  
39 evaluate intervention effectiveness. Blinding of outcome assessors will be performed if a  
40  
41 definitive RCT is considered feasible.  
42  
43  
44  
45  
46  
47  
48  
49  
50  
51

### 52 **Intervention Development**

53  
54 The EX-FRAIL CKD exercise programme is a 12-week progressive, multi-component home-  
55  
56 based exercise programme. It was developed through review of international guidance and  
57  
58 systematic reviews that evaluated exercise interventions in CKD and older adult  
59  
60



1  
2  
3 populations. A 2014 systematic review demonstrated that exercise training is associated  
4  
5 with improved health outcomes in adults with CKD [15]. However, most studies evaluated  
6  
7 interventions in adults with dialysis-dependent CKD and mostly aerobic exercise  
8  
9 interventions [15]. The authors recommended further evaluation in non-dialysis populations  
10  
11 and further analysis of resistance training and multi-component interventions [15]. Several  
12  
13 systematic reviews have demonstrated that frail older adults benefit from exercise  
14  
15 programmes and reported multi-component exercise programmes (involving combinations  
16  
17 of strength, aerobic and balance training) were often effective [18,32,33]. A 2012 Cochrane  
18  
19 review determined that both multi-component group exercise and home-based exercise  
20  
21 reduce the rate of falls in older adults [34]. Furthermore, a systematic review of home-  
22  
23 based exercise programmes suggested that there is preliminary evidence that home-based  
24  
25 exercise interventions may improve disability in older adults with moderate frailty [22]. The  
26  
27 American College of Sports Medicine and American Heart Association Guidelines highlight  
28  
29 the importance of physical activity being increased gradually in older adults, particularly  
30  
31 those that are very deconditioned [35]. Additionally, the guidelines recommend that older  
32  
33 adults who reduce their sedentary behaviour, even if not to the level recommended, still  
34  
35 attain health benefits [35].  
36  
37  
38  
39  
40  
41  
42  
43  
44  
45  
46  
47  
48  
49  
50  
51  
52  
53  
54  
55  
56  
57  
58  
59  
60

### **Intervention Description**

Participants randomised to the intervention will receive an individual exercise education session delivered by a physiotherapist experienced in exercise prescription. Participants will be provided information about the potential benefits of physical activity for their general health and well-being. They will subsequently receive instruction on how to complete the

1  
2  
3 exercises within the exercise programme safely and effectively. The exercises will be  
4  
5 demonstrated to participants by a physiotherapist. The participants will then be asked to  
6  
7 practice the exercises under supervision to ensure appropriate technique. If a participant is  
8  
9 unable to perform a specific exercise, for example due to a functional limitation, an  
10  
11 alternative will be provided that focuses on the same muscle groups. Furthermore, if a  
12  
13 participant is unable to complete the proposed number of repetitions, the participant will  
14  
15 be advised to perform a lower number of repetitions initially. This approach reflects exercise  
16  
17 prescription in clinical practice and should increase the feasibility and safety of the exercise  
18  
19 programme.  
20  
21  
22  
23  
24  
25  
26  
27

28 Table 3 demonstrates the six exercises within the programme and details the progressions  
29  
30 for each exercise. Participants categorised as frail will initially be advised to perform each  
31  
32 exercise at level 1, whereas participants categorised as pre-frail will be advised to perform  
33  
34 each exercise at level 2, unless the physiotherapist determines that it would be unsafe for  
35  
36 an individual participant to perform a specific exercise at this level. Participants will receive  
37  
38 education on how to use the Borg rating of perceived exertion [36] and will be advised to  
39  
40 perform exercise 1 at a light intensity (Borg score <12) and exercises 2-6 at a moderate  
41  
42 intensity (Borg score 12-16). Participants will be asked to gradually increase physical activity  
43  
44 levels so that they ultimately perform three exercise sessions at home per week, with each  
45  
46 session lasting approximately 30-45 minutes. Participants will be provided an exercise  
47  
48 guidebook comprising written guidance on each exercise with accompanying photographs  
49  
50 of models demonstrating the exercises.  
51  
52  
53  
54  
55  
56  
57  
58  
59  
60

1  
2  
3 Participants will be encouraged to complete an exercise diary. The diary prompts  
4  
5 participants to document each exercise session including when they exercised, if they  
6  
7 completed all exercises, the duration to complete the full exercise session and their Borg  
8  
9 rating of perceived exertion for each exercise completed. Participants randomised to the  
10  
11 intervention will receive weekly telephone calls from the physiotherapist or a specialist  
12  
13 trainee in renal medicine who has clinical and research experience with patients living with  
14  
15 frailty and CKD. To enhance intervention fidelity, a telephone pro forma will be used that  
16  
17 prompts a review of the participants exercise diary, exercise technique, any problems  
18  
19 (including symptoms, falls and healthcare episodes), an exploration of any participant  
20  
21 uncertainties about the exercise programme and goal-setting for the following week. The  
22  
23 physiotherapist and specialist trainee will discuss the outcomes of telephone calls, as a  
24  
25 further safeguard of intervention fidelity. The telephone calls will be used to provide  
26  
27 ongoing encouragement and to advise on exercise progression. If participants can perform  
28  
29 exercises 2-6 comfortably (Borg score <12), the physiotherapist or specialist trainee will  
30  
31 discuss exercise progression with the participant. If required, participants will be offered  
32  
33 additional educational sessions during the 12-week intervention period to ensure safe  
34  
35 exercise technique when progressing to more difficult exercise levels. Figure 2 illustrates the  
36  
37 exercise intervention logic model and Table 4 summarises the intervention using the  
38  
39 Template for Intervention Description and Replication (TIDieR) checklist [37].  
40  
41  
42  
43  
44  
45  
46  
47  
48  
49  
50  
51

## 52 **Patient and Public Involvement**

53  
54 The study was presented to the LTHTR Research Development Group, which includes lay  
55  
56 members. Feedback from this meeting led to the adoption of a study design that included a  
57  
58 nested qualitative interview study. The proposed study was also presented to members of a  
59  
60

1  
2  
3 local kidney patient charity, discussed in a patient focus group, supported by funding  
4  
5 received from National Institute of Health Research (NIHR) Research Design Service, and  
6  
7 with the LTHTR Lay Research Group, which is a group of local lay representatives. The study  
8  
9 team were encouraged by positive feedback received on proposed study visits, outcome  
10  
11 assessments and the exercise programme, including the burden of the intervention.  
12  
13  
14  
15  
16  
17

### 18 **Primary Feasibility Outcome Measures**

19  
20 Primary feasibility outcome measures will be assessed as recommended by the CONSORT  
21  
22 randomised pilot and feasibility trial guidelines [38]. The proportion of patients attending  
23  
24 nephrology clinics that are eligible for study consent and the proportion of eligible patients  
25  
26 subsequently recruited will be recorded. Reasons for ineligibility and non-consent will be  
27  
28 recorded. In the intervention arm, adherence will be assessed by telephoning participants  
29  
30 weekly to review the preceding week's exercise activity and by reviewing participant  
31  
32 exercise diaries at the end of the study period. Reasons for non-adherence will be  
33  
34 documented. The proportion of participants who complete all outcome measures and who  
35  
36 are lost to follow-up will be assessed. Reasons for failure to complete outcome measures  
37  
38 and for study withdrawal will be recorded.  
39  
40  
41  
42  
43  
44  
45  
46

47 Using a predetermined topic guide, the specialist trainee will conduct semi-structured face-  
48  
49 to-face interviews with participants. The interviews aim to explore the acceptability of the  
50  
51 randomisation procedure, outcome measures and, in the intervention arm, a progressive  
52  
53 home-based exercise programme. Perceived safety and barriers to participation will be  
54  
55 explored. The interviews will be conducted in a private environment at the NIHR Lancashire  
56  
57 Clinical Research Facility. Interviews will be audio recorded using a digital recorder with the  
58  
59  
60

1  
2  
3 participant's consent and will last approximately 30-60 minutes. Interviews will be  
4  
5 transcribed verbatim.  
6  
7  
8  
9

10 A 'stop', 'change' and 'go' approach to progression criteria will be used as described in the  
11 literature [39], with qualitative data used to identify areas for adaptation for a definitive RCT  
12  
13 if required. Table 5 details the study progression criteria.  
14  
15  
16  
17

## 20 **Secondary Outcome Measures**

### 21 **1. Physical Function**

22  
23 Walking speed is independently associated with all-cause mortality in adults with CKD [40].  
24  
25

26 Walking speed will be assessed using infrared timing gates (Brower Timing System 2012,  
27  
28 Brower Timing Systems, Draper, UT, USA). Participants will be asked to walk 15 feet at their  
29  
30 normal walking pace on two occasions, using their usual walking aid if applicable. The  
31  
32 fastest of two assessments will be used for analysis. A meaningful change in walking speed  
33  
34 has been described as 0.05 metres per second [41,42].  
35  
36  
37  
38  
39  
40  
41

42 The Short Physical Performance Battery (SPPB) comprises a group of measures of lower  
43  
44 extremity function that together can be used to generate a composite score between 0 and  
45  
46 12 [43]. SPPB score is associated with mortality in adults with CKD [44]. A minimally significant  
47  
48 change in SPPB has been reported as 0.5 points [41,42]. The measures included in the SPPB  
49  
50 are:  
51  
52  
53

- 54 • Five chair stands: timed standing from a chair at a standardised height five times as quickly  
55  
56 as able.  
57  
58  
59  
60

- Balance testing: stand in three positions with increasing difficulty (standing with feet side by side, in a semi-tandem position and in a full tandem position) for 10 seconds in each position.
- Walking speed: timed walking 8 feet at usual pace.

## 2. Frailty

As described earlier and detailed in Table 1, the FP can be used to diagnose pre-frailty and frailty [2], which are associated with adverse outcomes in CKD populations [6-11]. Studies have not evaluated the change in frailty status following exercise interventions in CKD populations. However, McAdams-DeMarco et al demonstrated an improvement in Frailty Phenotype score of 0.3 points following transplantation [45].

## 3. Activities of Daily Living

The Barthel Index evaluates independence with 10 activities of daily living to generate a score between 0 and 100 [46]. Higher scores indicate greater independence.

## 4. Falls

The Falls Efficacy Scale-International (FES-I) tool will be used to assess fall concern [47,48]. It is a self-report questionnaire that asks individuals to rate their fall concern for 16 situations on a four-point scale. The answers are totalled to provide a cumulative score between 16 and 64. A score between 16 and 19 indicates low fall concern, between 20 and 27 moderate fall

1  
2  
3 concern and between 28 and 64 high fall concern. The number of falls within the preceding 6  
4  
5 months will also be recorded.  
6  
7  
8  
9

## 10 **5. Symptom-Burden**

11  
12 The Palliative Care Outcome Scale-Symptoms RENAL (POS-S RENAL) will be used to assess  
13  
14 symptom burden [49]. The POS-S RENAL questionnaire asks individuals to report 17  
15  
16 symptoms that may have affected them over the preceding week and to indicate to what  
17  
18 extent. Each symptom is scored and scores totalled to create a symptom-burden score with  
19  
20 higher scores representing greater symptom-burden.  
21  
22  
23  
24  
25  
26

## 27 **6. HRQOL**

28  
29 The Short Form-12v2 (SF-12) comprises 12 questions that are used to assess HRQOL [50,51].  
30  
31 The answers are used to produce an 8-scale profile of health and well-being and to generate  
32  
33 physical and mental health summary measures. Higher SF-12 scores represent better HRQOL.  
34  
35 The proposed minimal important difference for SF-12 summary scales is 3 T-score points [52].  
36  
37  
38  
39  
40  
41

## 42 **Data Management**

43  
44 All electronic study data will be recoded on a secure, password-protected database on the  
45  
46 LTHTR server. The server is only be accessible using password-protected user profiles on  
47  
48 LTHTR computers. Participant names and hospital identification numbers will not be  
49  
50 recorded on this database; participants will be identified by a study-specific participant  
51  
52 number. There will not be a formal data monitoring committee. However, data will be  
53  
54 managed in accordance with the LTHTR Information Governance Policy.  
55  
56  
57  
58  
59  
60

## Analysis Plan

As recommended by the 2010 CONSORT guidelines [38], feasibility quantitative outcome measures will be reported descriptively with 95% confidence intervals. This will include the proportion of eligible patients and recruited participants, participants who adhere to the intervention, participants who complete all outcome assessments and participants lost to follow-up. Secondary outcome measures will also be reported descriptively with 95% confidence intervals. The standard deviation of walking speed will be estimated for both trial arms to inform the sample size calculation for a definitive RCT. SPSS software (version 25, IBM Corp) will be used for statistical analysis.

Qualitative data will be analysed using thematic analysis whereby narrative segments will first be coded and then translated into more abstract themes in an iterative manner [53]. NVivo software (version 12.5.0, QSR International) will be used to support analysis. Two members of the researcher team will compare themes to ensure all codes are represented. Qualitative and quantitative findings will be linked using a triangulation approach as described by Farmer et al [54] to provide a more comprehensive understanding of trial and intervention acceptability.

## Adverse Events

Serious adverse events are defined as any episode during the study period that requires inpatient hospitalisation, results in persistent/significant disability, is life threatening or results in death. All adverse events will be discussed with the medically-trained Chief Investigator who will assess seriousness and causality. All adverse events will be reported to the study sponsor and all suspected unexpected serious adverse reactions reported to the



1  
2  
3 regional ethics committee. The trial will be stopped prematurely if three or more suspected  
4  
5 unexpected serious adverse reactions occur.  
6  
7  
8  
9

### 10 **Study Steering Committee**

11  
12 A study steering committee will provide scientific, ethical and financial oversight of research  
13  
14 activity. The committee comprises clinicians, physiotherapists, academics, a study sponsor  
15  
16 representative and a patient representative. Meetings will be held during before, during and  
17  
18 on completion of the study. The patient representative will be remunerated as  
19  
20 recommended by INVOLVE.  
21  
22  
23  
24  
25  
26  
27

### 28 **Ethics and Dissemination**

29  
30 Study ethical approval has been granted by the North West Greater Manchester East  
31  
32 Research Ethics Committee (reference 18/NW/0211) and the National Health Service (NHS)  
33  
34 Health Research Authority (project reference 244772). The LTHTR Centre for Health  
35  
36 Research and Innovation accepted the role and responsibilities of study sponsorship. The  
37  
38 study is subject to the LTHTR Internal Research and NIHR audit programmes to ensure all  
39  
40 research activities are performed in accordance with the international standards of Good  
41  
42 Clinical Practice, United Kingdom clinical trials legislation and trust policies. The trial is  
43  
44 registered with the International Standard Randomised Controlled Trial Number Registry  
45  
46 (ISRCTN87708989). Protocol amendments approved by the Research Ethics Committee/NHS  
47  
48 Health Research Authority will be communicated with the study sponsor, study team and,  
49  
50 where necessary, the trial registry.  
51  
52  
53  
54  
55  
56  
57  
58  
59  
60

1  
2  
3 The study dataset will not be made publicly available as it may be possible to identify  
4 participants from interview transcripts and as this pilot study does not aim to use  
5 quantitative data to demonstrate intervention effectiveness. The study team aim to publish  
6 the findings in a peer-reviewed journal and present the results at national and international  
7 conferences. A summary of findings will be provided to participants, a local kidney patient  
8 charity and the funding body.  
9  
10  
11  
12  
13  
14  
15  
16  
17  
18  
19  
20  
21  
22  
23  
24  
25  
26  
27  
28  
29  
30  
31  
32  
33  
34  
35  
36  
37  
38  
39  
40  
41  
42  
43  
44  
45  
46  
47  
48  
49  
50  
51  
52  
53  
54  
55  
56  
57  
58  
59  
60

For peer review only

## DISCUSSION

To our knowledge, the EX-FRAIL CKD trial is the first pilot RCT of a progressive home-based exercise intervention specifically designed for pre-frail and frail older adults with CKD. Given the uncertainties around recruitment rates, intervention adherence and outcome measure acceptability, it is necessary to perform a pilot study prior to proceeding with a full-scale trial. These uncertainties have been considered during study design, though amendments may be required to maximise the success of a multi-centre RCT.

This study's strengths include the use of a validated frailty screening measure [27] to assist participant recruitment and, during baseline assessment, the use of the reference standard for diagnosing physical frailty, i.e. the FP [2], to determine suitability for randomisation. This methodology will minimise the number of robust individuals approached for study consent and ensure that only pre-frail and frail participants receive the intervention, thereby strengthening any conclusions that can be made following study completion. Furthermore, the nested qualitative study will complement quantitative data analysis by exploring the acceptability of the randomisation procedures, outcome measures and intervention, thus identifying areas for adaptation in a definitive RCT. An acknowledged limitation is that semi-structured interviews will be completed by a researcher involved in delivery of the study intervention, which may influence participant responses. However, the participants will be encouraged to give honest responses by reinforcing that the study objectives include to explore the acceptability of the study and identify areas requiring adaptation for a definitive RCT. For pragmatic reasons, patients that decline to participate in the study will not be invited to participate in an interview. However, participants that decide to stop exercising earlier than planned will be invited to participate in an interview to explore their experience

1  
2  
3 of the study. Furthermore, participants' rationale and motivation for enrolling in the study  
4  
5 will be explored during interviews.  
6  
7  
8  
9

10 Home-based exercise programmes have been performed safely in frail older adults [22],  
11  
12 however, perceived safety concerns (e.g. fall concerns) may influence participant adherence  
13  
14 to the exercise programme. Participants randomised to the intervention arm will receive  
15  
16 exercise education from a physiotherapist experienced in exercise prescription. Moreover,  
17  
18 the exercise programme will be delivered in a graded and progressive manner with the use  
19  
20 of weekly telephone calls that ensure safe exercise practices, explore participant  
21  
22 uncertainties and provide ongoing support. We hope that the above will minimise  
23  
24 participant concerns, therefore maximising participant adherence to the exercise  
25  
26 programme.  
27  
28  
29  
30  
31  
32  
33  
34

35 The EX-FRAIL CKD trial aims to inform the design of a definitive multi-centre RCT that  
36  
37 explores the benefits of a progressive, multi-component home-based exercise programme.  
38  
39 If a definitive RCT demonstrates improvements in the physical function of participants,  
40  
41 associated improvements in mobility, fall concern, independence, symptom-burden and  
42  
43 HRQOL are anticipated, supporting the case for a home-based exercise programme within  
44  
45 routine clinical care.  
46  
47  
48  
49  
50  
51

## 52 **Trial Status**

53  
54 The study opened in August 2018 and the first participant was recruited in November 2018.  
55  
56 Data collection was completed in December 2019.  
57  
58  
59  
60

**REFERENCES**

- 1 Clegg A, Young J, Iliffe S, Rikkert MO, Rockwood K: Frailty in elderly people. *Lancet* (London, England) 2013;381:752-762.
- 2 Fried LP, Tangen CM, Walston J, Newman AB, Hirsch C, Gottdiener J, Seeman T, Tracy R, Kop WJ, Burke G, McBurnie MA: Frailty in older adults: evidence for a phenotype. *J Gerontol A Biol Sci Med Sci* 2001;56:M146-156.
- 3 Nixon AC, Bampouras TM, Pendleton N, Woywodt A, Mitra S, Dhaygude A: Frailty and chronic kidney disease: current evidence and continuing uncertainties. *Clin Kidney J* 2018;11:236-245.
- 4 Collard RM, Boter H, Schoevers RA, Oude Voshaar RC: Prevalence of frailty in community-dwelling older persons: a systematic review. *J Am Geriatr Soc* 2012;60:1487-1492.
- 5 Chowdhury R, Peel NM, Krosch M, Hubbard RE: Frailty and chronic kidney disease: A systematic review. *Arch Gerontol Geriatr* 2016;68:135-142.
- 6 Nixon AC, Bampouras TM, Pendleton N, Mitra S, Brady ME, Dhaygude AP: Frailty is independently associated with worse health-related quality of life in chronic kidney disease: a secondary analysis of the Frailty Assessment in Chronic Kidney Disease study. *Clinical kidney journal* 2019;13:85-94.
- 7 Iyasere OU, Brown EA, Johansson L, Huson L, Smee J, Maxwell AP, Farrington K, Davenport A: Quality of Life and Physical Function in Older Patients on Dialysis: A Comparison of Assisted Peritoneal Dialysis with Hemodialysis. *Clin J Am Soc Nephrol* 2016;11:423-430.

- 1  
2  
3 8 McAdams-DeMarco MA, Suresh S, Law A, Salter ML, Gimenez LF, Jaar BG, Walston  
4  
5 JD, Segev DL: Frailty and falls among adult patients undergoing chronic hemodialysis: a  
6  
7 prospective cohort study. *BMC Nephrol* 2013;14:224.  
8  
9  
10 9 Johansen KL, Chertow GM, Jin C, Kutner NG: Significance of frailty among dialysis  
11  
12 patients. *Journal of the American Society of Nephrology : JASN* 2007;18:2960-2967.  
13  
14  
15 10 Roshanravan B, Khatri M, Robinson-Cohen C, Levin G, Patel KV, de Boer IH, Seliger S,  
16  
17 Ruzinski J, Himmelfarb J, Kestenbaum B: A prospective study of frailty in nephrology-  
18  
19 referred patients with CKD. *American journal of kidney diseases : the official journal of the*  
20  
21  
22  
23  
24  
25  
26  
27  
28  
29  
30  
31  
32  
33  
34  
35  
36  
37  
38  
39  
40  
41  
42  
43  
44  
45  
46  
47  
48  
49  
50  
51  
52  
53  
54  
55  
56  
57  
58  
59  
60
- 11 McAdams-DeMarco MA, Law A, Salter ML, Boyarsky B, Gimenez L, Jaar BG, Walston  
JD, Segev DL: Frailty as a novel predictor of mortality and hospitalization in individuals of all  
ages undergoing hemodialysis. *J Am Geriatr Soc* 2013;61:896-901.
- 12 Johansen KL, Chertow GM, Kutner NG, Dalrymple LS, Grimes BA, Kaysen GA: Low  
level of self-reported physical activity in ambulatory patients new to dialysis. *Kidney Int*  
2010;78:1164-1170.
- 13 John SG, Sigrist MK, Taal MW, McIntyre CW: Natural history of skeletal muscle mass  
changes in chronic kidney disease stage 4 and 5 patients: an observational study. *PloS one*  
2013;8:e65372.
- 14 Heiwe S, Jacobson SH: Exercise training for adults with chronic kidney disease. *The*  
*Cochrane database of systematic reviews* 2011:Cd003236.
- 15 Heiwe S, Jacobson SH: Exercise training in adults with CKD: a systematic review and  
meta-analysis. *American journal of kidney diseases : the official journal of the National*  
*Kidney Foundation* 2014;64:383-393.

- 1  
2  
3  
4  
5  
6  
7  
8  
9  
10  
11  
12  
13  
14  
15  
16  
17  
18  
19  
20  
21  
22  
23  
24  
25  
26  
27  
28  
29  
30  
31  
32  
33  
34  
35  
36  
37  
38  
39  
40  
41  
42  
43  
44  
45  
46  
47  
48  
49  
50  
51  
52  
53  
54  
55  
56  
57  
58  
59  
60
- 16 Ferrucci L, Guralnik JM, Studenski S, Fried LP, Cutler GB, Jr., Walston JD: Designing randomized, controlled trials aimed at preventing or delaying functional decline and disability in frail, older persons: a consensus report. *J Am Geriatr Soc* 2004;52:625-634.
- 17 McMurdo ME, Roberts H, Parker S, Wyatt N, May H, Goodman C, Jackson S, Gladman J, O'Mahony S, Ali K, Dickinson E, Edison P, Dyer C, Age, Ageing Specialty Group NCCRN: Improving recruitment of older people to research through good practice. *Age Ageing* 2011;40:659-665.
- 18 de Labra C, Guimaraes-Pinheiro C, Maseda A, Lorenzo T, Millan-Calenti JC: Effects of physical exercise interventions in frail older adults: a systematic review of randomized controlled trials. *BMC Geriatr* 2015;15:154.
- 19 Brown SA, Tyrer FC, Clarke AL, Lloyd-Davies LH, Stein AG, Tarrant C, Burton JO, Smith AC: Symptom burden in patients with chronic kidney disease not requiring renal replacement therapy. *Clin Kidney J* 2017;10:788-796.
- 20 Khan SS, Kazmi WH, Abichandani R, Tighiouart H, Pereira BJ, Kausz AT: Health care utilization among patients with chronic kidney disease. *Kidney Int* 2002;62:229-236.
- 21 Ashworth NL, Chad KE, Harrison EL, Reeder BA, Marshall SC: Home versus center based physical activity programs in older adults. *The Cochrane database of systematic reviews* 2005:CD004017.
- 22 Clegg AP, Barber SE, Young JB, Forster A, Iliffe SJ: Do home-based exercise interventions improve outcomes for frail older people? Findings from a systematic review. *Rev Clin Gerontol* 2012;22:68-78.
- 23 Craig P, Dieppe P, Macintyre S, Michie S, Nazareth I, Petticrew M: Developing and evaluating complex interventions: the new Medical Research Council guidance. *BMJ (Clinical research ed)* 2008;337:a1655.

- 1  
2  
3 24 Chan A-W, Tetzlaff JM, Altman DG, Laupacis A, Gøtzsche PC, Krleža-Jerić K,  
4  
5 Hróbjartsson A, Mann H, Dickersin K, Berlin JA, Doré CJ, Parulekar WR, Summerskill WSM,  
6  
7 Groves T, Schulz KF, Sox HC, Rockhold FW, Rennie D, Moher D: SPIRIT 2013 statement:  
8  
9 defining standard protocol items for clinical trials. *Annals of internal medicine*  
10  
11 2013;158:200-207.  
12  
13  
14  
15 25 Chan A-W, Tetzlaff JM, Gøtzsche PC, Altman DG, Mann H, Berlin JA, Dickersin K,  
16  
17 Hróbjartsson A, Schulz KF, Parulekar WR, Krleža-Jeric K, Laupacis A, Moher D: SPIRIT 2013  
18  
19 explanation and elaboration: guidance for protocols of clinical trials. *BMJ (Clinical research*  
20  
21 *ed)* 2013;346:e7586-e7586.  
22  
23  
24  
25 26 Rockwood K, Song X, MacKnight C, Bergman H, Hogan DB, McDowell I, Mitnitski A: A  
26  
27 global clinical measure of fitness and frailty in elderly people. *Cmaj* 2005;173:489-495.  
28  
29  
30 27 Nixon AC, Bampouras TM, Pendleton N, Mitra S, Dhaygude AP: Diagnostic Accuracy  
31  
32 of Frailty Screening Methods in Advanced Chronic Kidney Disease. *Nephron* 2019;141:147-  
33  
34 155.  
35  
36  
37 28 Pescatello L, Arena R, Riebe D, Thompson P: Exercise Prescription for Patients with  
38  
39 Cardiovascular and Cerebrovascular Disease; American College of Sports Medicine's  
40  
41 Guidelines for Exercise Testing and Prescription, 2013, pp 236-259.  
42  
43  
44 29 Julious SA: Sample size of 12 per group rule of thumb for a pilot study.  
45  
46 *Pharmaceutical Statistics* 2005;4:287-291.  
47  
48  
49 30 Whitehead AL, Julious SA, Cooper CL, Campbell MJ: Estimating the sample size for a  
50  
51 pilot randomised trial to minimise the overall trial sample size for the external pilot and  
52  
53 main trial for a continuous outcome variable. *Statistical methods in medical research*  
54  
55 2016;25:1057-1073.  
56  
57  
58  
59  
60



- 1  
2  
3 31 Kernan WN, Viscoli CM, Makuch RW, Brass LM, Horwitz RI: Stratified randomization  
4 for clinical trials. *Journal of clinical epidemiology* 1999;52:19-26.  
5  
6  
7  
8 32 Theou O, Stathokostas L, Roland KP, Jakobi JM, Patterson C, Vandervoort AA, Jones  
9 GR: The effectiveness of exercise interventions for the management of frailty: a systematic  
10 review. *Journal of aging research* 2011;2011:569194.  
11  
12  
13 33 de Vries NM, van Ravensberg CD, Hobbelen JS, Olde Rikkert MG, Staal JB, Nijhuis-van  
14 der Sanden MW: Effects of physical exercise therapy on mobility, physical functioning,  
15 physical activity and quality of life in community-dwelling older adults with impaired  
16 mobility, physical disability and/or multi-morbidity: a meta-analysis. *Ageing Res Rev*  
17 2012;11:136-149.  
18  
19  
20 34 Gillespie LD, Robertson MC, Gillespie WJ, Sherrington C, Gates S, Clemson LM, Lamb  
21 SE: Interventions for preventing falls in older people living in the community. *Cochrane*  
22 *Database Syst Rev* 2012:Cd007146.  
23  
24  
25 35 Nelson ME, Rejeski WJ, Blair SN, Duncan PW, Judge JO, King AC, Macera CA,  
26 Castaneda-Sceppa C, American College of Sports M, American Heart A: Physical activity and  
27 public health in older adults: recommendation from the American College of Sports  
28 Medicine and the American Heart Association. *Circulation* 2007;116:1094-1105.  
29  
30  
31 36 Borg G: Perceived exertion as an indicator of somatic stress. *Scandinavian journal of*  
32 *rehabilitation medicine* 1970;2:92-98.  
33  
34  
35 37 Hoffmann TC, Glasziou PP, Boutron I, Milne R, Perera R, Moher D, Altman DG,  
36 Barbour V, Macdonald H, Johnston M, Lamb SE, Dixon-Woods M, McCulloch P, Wyatt JC,  
37 Chan AW, Michie S: Better reporting of interventions: template for intervention description  
38 and replication (TIDieR) checklist and guide. *BMJ (Clinical research ed)* 2014;348:g1687.  
39  
40  
41  
42  
43  
44  
45  
46  
47  
48  
49  
50  
51  
52  
53  
54  
55  
56  
57  
58  
59  
60

1  
2  
3 38 Eldridge SM, Chan CL, Campbell MJ, Bond CM, Hopewell S, Thabane L, Lancaster GA:  
4  
5 CONSORT 2010 statement: extension to randomised pilot and feasibility trials. *BMJ (Clinical*  
6  
7 *research ed)* 2016;355:i5239.

8  
9  
10 39 Avery KN, Williamson PR, Gamble C, O'Connell Francischetto E, Metcalfe C, Davidson  
11  
12 P, Williams H, Blazeby JM: Informing efficient randomised controlled trials: exploration of  
13  
14 challenges in developing progression criteria for internal pilot studies. *BMJ open*  
15  
16 2017;7:e013537.

17  
18 40 Roshanravan B, Robinson-Cohen C, Patel KV, Ayers E, Littman AJ, de Boer IH, Ikizler  
19  
20 TA, Himmelfarb J, Katzel LI, Kestenbaum B, Seliger S: Association between physical  
21  
22 performance and all-cause mortality in CKD. *Journal of the American Society of Nephrology :*  
23  
24 *JASN* 2013;24:822-830.

25  
26 41 Kwon S, Perera S, Pahor M, Katula JA, King AC, Groessl EJ, Studenski SA: What is a  
27  
28 meaningful change in physical performance? Findings from a clinical trial in older adults (the  
29  
30 LIFE-P study). *J Nutr Health Aging* 2009;13:538-544.

31  
32 42 Perera S, Mody SH, Woodman RC, Studenski SA: Meaningful change and  
33  
34 responsiveness in common physical performance measures in older adults. *J Am Geriatr Soc*  
35  
36 2006;54:743-749.

37  
38 43 Guralnik JM, Simonsick EM, Ferrucci L, Glynn RJ, Berkman LF, Blazer DG, Scherr PA,  
39  
40 Wallace RB: A short physical performance battery assessing lower extremity function:  
41  
42 association with self-reported disability and prediction of mortality and nursing home  
43  
44 admission. *Journal of gerontology* 1994;49:M85-94.

45  
46 44 MacKinnon HJ, Wilkinson TJ, Clarke AL, Gould DW, O'Sullivan TF, Xenophontos S,  
47  
48 Watson EL, Singh SJ, Smith AC: The association of physical function and physical activity with  
49  
50  
51  
52  
53  
54  
55  
56  
57  
58  
59  
60

1  
2  
3 all-cause mortality and adverse clinical outcomes in nondialysis chronic kidney disease: a  
4  
5 systematic review. *Therapeutic Advances in Chronic Disease* 2018  
6  
7

8 45 McAdams-DeMarco MA, Isaacs K, Darko L, Salter ML, Gupta N, King EA, Walston J,  
9  
10 Segev DL: Changes in Frailty After Kidney Transplantation. *J Am Geriatr Soc* 2015;63:2152-  
11  
12 2157.  
13

14  
15 46 Mahoney FI, Barthel DW: FUNCTIONAL EVALUATION: THE BARTHEL INDEX. *Maryland*  
16  
17 *state medical journal* 1965;14:61-65.  
18

19  
20 47 Yardley L, Beyer N, Hauer K, Kempen G, Piot-Ziegler C, Todd C: Development and  
21  
22 initial validation of the Falls Efficacy Scale-International (FES-I). *Age Ageing* 2005;34:614-  
23  
24 619.  
25

26  
27 48 Delbaere K, Close JC, Mikolaizak AS, Sachdev PS, Brodaty H, Lord SR: The Falls  
28  
29 Efficacy Scale International (FES-I). A comprehensive longitudinal validation study. *Age*  
30  
31 *Ageing* 2010;39:210-216.  
32

33  
34 49 Murphy EL, Murtagh FE, Carey I, Sheerin NS: Understanding symptoms in patients  
35  
36 with advanced chronic kidney disease managed without dialysis: use of a short patient-  
37  
38 completed assessment tool. *Nephron Clin Pract* 2009;111:c74-80.  
39

40  
41 50 Ware J, Jr., Kosinski M, Keller SD: A 12-Item Short-Form Health Survey: construction  
42  
43 of scales and preliminary tests of reliability and validity. *Medical care* 1996;34:220-233.  
44

45  
46 51 Lacson E, Jr., Xu J, Lin SF, Dean SG, Lazarus JM, Hakim RM: A comparison of SF-36  
47  
48 and SF-12 composite scores and subsequent hospitalization and mortality risks in long-term  
49  
50 dialysis patients. *Clin J Am Soc Nephrol* 2010;5:252-260.  
51

52  
53 52 Maruish MEE: User's manual for the SF-12v2 Health Survey (3rd ed.). Lincoln, RI:  
54  
55 QualityMetric Incorporated 2012  
56  
57  
58  
59  
60

- 1  
2  
3 53 Braun V, Clarke V: Using thematic analysis in psychology. *Qualitative Research in*  
4  
5 *Psychology* 2006;3:77-101.  
6  
7  
8 54 Farmer T, Robinson K, Elliott SJ, Eyles J: Developing and implementing a triangulation  
9  
10 protocol for qualitative health research. *Qual Health Res* 2006;16:377-394.  
11  
12  
13 55 Taylor HL, Jacobs DR, Jr., Schucker B, Knudsen J, Leon AS, Debacker G: A  
14  
15 questionnaire for the assessment of leisure time physical activities. *Journal of chronic*  
16  
17 *diseases* 1978;31:741-755.  
18  
19  
20 56 Orme JG, Reis J, Herz EJ: Factorial and discriminant validity of the Center for  
21  
22 *Epidemiological Studies Depression (CES-D) scale*. *Journal of clinical psychology* 1986;42:28-  
23  
24  
25 33.  
26  
27  
28  
29  
30  
31  
32  
33  
34  
35  
36  
37  
38  
39  
40  
41  
42  
43  
44  
45  
46  
47  
48  
49  
50  
51  
52  
53  
54  
55  
56  
57  
58  
59  
60

## TABLES

**Table 1. The Frailty Phenotype.**

| Frailty Phenotype Component                                               | Measure                                                                                                                                                                                                                                                                                                                                                                                                                                                                                                                  |
|---------------------------------------------------------------------------|--------------------------------------------------------------------------------------------------------------------------------------------------------------------------------------------------------------------------------------------------------------------------------------------------------------------------------------------------------------------------------------------------------------------------------------------------------------------------------------------------------------------------|
| <b>Unintentional Weight Loss</b>                                          | ≥10 pounds or ≥5% body weight over the preceding 12 months.                                                                                                                                                                                                                                                                                                                                                                                                                                                              |
| <b>Weakness</b>                                                           | Hand grip strength will be assessed in the seated position with the elbow positioned at 90 degrees, supported by the arm of a chair, and with a hand-grip dynamometer (Takei 5101 GRIP-A dynamometer, Takei Scientific Inst. Co. Ltd., Niigata, Japan) supported by the assessor. Both arms will be examined with the highest score from three efforts from each side used for analysis. The body mass index and gender stratified hand grip strength cut-offs proposed by Fried et al are used to define weakness [2].  |
| <b>Slowness</b>                                                           | Walking speed (15 feet) will be assessed as outlined in the section titled 'Physical Function'. The height and gender stratified walking speed cut-offs proposed by Fried et al are used to define slowness [2].                                                                                                                                                                                                                                                                                                         |
| <b>Low Physical Activity</b>                                              | A modified version of the Minnesota Leisure Time Questionnaire [55] will be used to assess physical activity. Low physical activity is defined as <383 kcal/wk for men and <270 kcal/wk for women [2].                                                                                                                                                                                                                                                                                                                   |
| <b>Self-perceived Exhaustion</b>                                          | The CES-D Scale will be used to assess self-perceived exhaustion [56]. Participants will be read the following statements: (1) I felt that everything I did was an effort. (2) I could not get going. Participants will then be asked, 'How often in the last week did you feel this way?' and provided the following scale: 0 = rarely or none of the time, 1 = some of the time, 2 = moderate amount of the time, 3 = most of the time. Self-perceived exhaustion is defined as an answer ≥2 for either statement [2]. |
| <b>Frailty is diagnosed if 3 or more frailty components are present.</b>  |                                                                                                                                                                                                                                                                                                                                                                                                                                                                                                                          |
| <b>Pre-frailty is diagnosed if 1 or 2 frailty components are present.</b> |                                                                                                                                                                                                                                                                                                                                                                                                                                                                                                                          |

kcal/wk, Kilocalories per week; CES-D, Center for Epidemiological Studies Depression.

**Table 2. Schedule of Assessments**

| Assessment                | Time      |          |           |
|---------------------------|-----------|----------|-----------|
|                           | Screening | Baseline | Follow-Up |
| Clinical Frailty Scale    | X         |          |           |
| Clinical Characteristics  | X         | X        |           |
| Weight, Height, HR, BP    |           | X        | X         |
| Laboratory Variables      | X         | X        |           |
| Frailty Phenotype         |           | X        | X         |
| SPPB                      |           | X        | X         |
| Barthel Index             |           | X        | X         |
| SF-12                     |           | X        | X         |
| FES-I                     |           | X        | X         |
| POS-S RENAL               |           | X        | X         |
| Semi-structured Interview |           |          | X         |

HR, Heart Rate; BP, Blood Pressure; SPPB, Short Physical Performance Battery; SF-12, Short Form-12v2; FES-I, Falls Efficacy Scale-International; POS-S RENAL, Palliative Care Outcome Scale-Symptoms RENAL.

**Table 3. The EX-FRAIL CKD Exercise Programme.**

| Exercise                        | Level 1                            | Level 2                                                | Level 3                                                     | Level 4                           |
|---------------------------------|------------------------------------|--------------------------------------------------------|-------------------------------------------------------------|-----------------------------------|
| <b>1. Walking</b>               | Walk for 1 minute                  | Walk for 2 minutes                                     | Walk for 10 minutes                                         | Walk for 15 minutes               |
| <b>2. Lower leg extension</b>   | Seated leg extension*              | Seated leg raise*                                      | Seated weighted (0.5kg) leg raise*                          | Seated weighted (1kg) leg raise*  |
| <b>3. Bilateral calf raises</b> | Seated calf raises*                | Standing calf raises placing hands on secure surface*  | Standing calf raises placing finger tips on secure surface* | Standing calf raises*             |
| <b>4. Sit to stand</b>          | Sit to stand using arms to assist* | Sit to stand without using arms to assist*             | Sit to stand holding 0.5kg weights*                         | Sit to stand holding 1kg weights* |
| <b>5. Wall/table push up</b>    | Wall push up**                     | Wall push up*                                          | Table push up**                                             | Table push up*                    |
| <b>6. Marching</b>              | Marching whilst seated*            | Marching whilst standing with hands on secure surface* | Marching whilst standing*                                   | Stair step*                       |

\*3 sets of 10 repetitions; \*\*3 sets of 5 repetitions.

**Table 4. TIDier Checklist.**

| Item                                       |                                                                                                                                                                                                                                                                                                                                                  |
|--------------------------------------------|--------------------------------------------------------------------------------------------------------------------------------------------------------------------------------------------------------------------------------------------------------------------------------------------------------------------------------------------------|
| <b>1. Brief name</b>                       | The EX-FRAIL CKD Exercise Programme                                                                                                                                                                                                                                                                                                              |
| <b>2. Rationale</b>                        | Described in 'Introduction' and section titled 'Intervention Development'                                                                                                                                                                                                                                                                        |
| <b>3. Materials</b>                        | Exercise guidebook, exercise diary and wrist/ankle weights.                                                                                                                                                                                                                                                                                      |
| <b>4. Procedures</b>                       | Described in section titled 'Intervention Description' and 'Participant Timeline'.                                                                                                                                                                                                                                                               |
| <b>5. Provider</b>                         | Exercise programme education will be delivered by a physiotherapist experienced in exercise prescription. Weekly telephone calls will be performed by the physiotherapist or specialist trainee with relevant experience.                                                                                                                        |
| <b>6. Modes of delivery</b>                | Face-to-face exercise education session followed by weekly telephone calls.                                                                                                                                                                                                                                                                      |
| <b>7. Location</b>                         | Exercise education sessions will be delivered in a private room at NIHR Lancashire Clinical Research Facility. All exercise sessions will be completed in the participant's own home.                                                                                                                                                            |
| <b>8. Frequency and duration</b>           | All participants will have an exercise education session lasting approximately 60 minutes. Participants will aim to perform three exercise sessions at home per week, lasting approximately 30-45 minutes each.                                                                                                                                  |
| <b>9. Tailoring</b>                        | Initial exercise level will be determined by frailty status, unless the physiotherapist determines otherwise due to safety concerns. An alternative exercise will be provided if a participant is unable to perform a specific exercise as originally intended.                                                                                  |
| <b>10. Modifications</b>                   | Cannot be described until study completion.                                                                                                                                                                                                                                                                                                      |
| <b>11. Adherence and fidelity: planned</b> | Exercises will be delivered as described in the exercise guidebook. If modification is needed, the participant (and study team) will be provided additional documentation. Adherence will be assessed during telephone calls and review of the participant's exercise diary. Outcomes of telephone calls will be discussed to maintain fidelity. |
| <b>12. Adherence and fidelity: actual</b>  | Cannot be described until study completion.                                                                                                                                                                                                                                                                                                      |

NIHR, National Institute of Health Research.



**Table 5. Progression Criteria.**

| <b>Progression Criteria</b>                                                        | <b>Stop/Go Thresholds</b>                                                                          |
|------------------------------------------------------------------------------------|----------------------------------------------------------------------------------------------------|
| <b>Eligibility</b>                                                                 | <b>STOP:</b> <5% of patients eligible<br><b>GO:</b> >10% of patients eligible                      |
| <b>Recruitment</b>                                                                 | <b>STOP:</b> <10% of eligible patients recruited<br><b>GO:</b> >30% of eligible patients recruited |
| <b>Exercise Adherence</b><br><b>(defined as <math>\geq 2</math> sessions/week)</b> | <b>STOP:</b> <30% adherence<br><b>GO:</b> >70% adherence                                           |
| <b>Outcome Measure Completion</b><br><b>(not including lost to follow up)</b>      | <b>STOP:</b> <70% outcome measure completion<br><b>GO:</b> >80% outcome measure completion         |
| <b>Lost to Follow-Up</b><br><b>(including withdrawn and lost)</b>                  | <b>STOP:</b> >50% lost to follow-up<br><b>GO:</b> <25% lost to follow-up                           |

**FIGURE LEGENDS**

**Figure 1. Study Flow Diagram.**

**Figure 2. Exercise Intervention Logic Model.**

## AUTHORS CONTRIBUTIONS

All authors contributed to the research idea and study design. ACN, TMB, HJG, and HMLY were involved in the development of the EX-FRAIL CKD exercise programme. ACN and HMLY developed the study progression criteria. ACN, TMB and HMLY contributed to the quantitative analysis plan. HMLY and KWF contributed to the qualitative analysis plan. MEB, NP, APD and SM were involved in supervision/mentorship. ACN drafted the manuscript. Each author contributed important intellectual content during manuscript revision and accepts responsibility for the overall work by ensuring that questions pertaining to the accuracy or integrity of any portion of the work are appropriately investigated and resolved.

## FUNDING STATEMENT

The EX-FRAIL CKD Trial is supported by a grant from Kidney Research UK (IN\_013\_20180306), which has funded equipment costs and HJG's study-related activity. ACN received a LTHTR Trustee Bursary Award to fund publication costs. ACN and HJG receive non-financial support from the NIHR Lancashire Clinical Research Facility. HMLY is supported by a grant from the NIHR (DRF-2016-09-015). The views expressed in this publication are those of the authors and not necessarily those of the NHS, the National Institute for Health Research or the Department of Health and Social Care. The funders had no role in the study design; collection, analysis, and interpretation of the data; writing the report; and the decision to submit the report for publication.

## COMPETING INTERESTS STATEMENT

Unrelated to this body of work, APD has received lecture fees from speaking at the invitation of MSD and received travel support from Pharmacosmos.

## LICENCE STATEMENT

I, the Submitting Author has the right to grant and does grant on behalf of all authors of the Work (as defined in the below author licence), an exclusive licence and/or a non-exclusive licence for contributions from authors who are: i) UK Crown employees; ii) where BMJ has agreed a CC-BY licence shall apply, and/or iii) in accordance with the terms applicable for US Federal Government officers or employees acting as part of their official duties; on a worldwide, perpetual, irrevocable, royalty-free basis to BMJ Publishing Group Ltd ("BMJ") its licensees and where the relevant Journal is co-owned by BMJ to the co-owners of the Journal, to publish the Work in BMJ Open and any other BMJ products and to exploit all rights, as set out in our licence.

The Submitting Author accepts and understands that any supply made under these terms is made by BMJ to the Submitting Author unless you are acting as an employee on behalf of your employer or a postgraduate student of an affiliated institution which is paying any applicable article publishing charge ("APC") for Open Access articles. Where the Submitting Author wishes to make the Work available on an Open Access basis (and intends to pay the relevant APC), the terms of reuse of such Open Access shall be governed by a Creative Commons licence – details of these licences and which Creative Commons licence will apply to this Work are set out in our licence referred to above.

1  
2  
3  
4  
5  
6  
7  
8  
9  
10  
11  
12  
13  
14  
15  
16  
17  
18  
19  
20  
21  
22  
23  
24  
25  
26  
27  
28  
29  
30  
31  
32  
33  
34  
35  
36  
37  
38  
39  
40  
41  
42  
43  
44  
45  
46  
47  
48  
49  
50  
51  
52  
53  
54  
55  
56  
57  
58  
59  
60

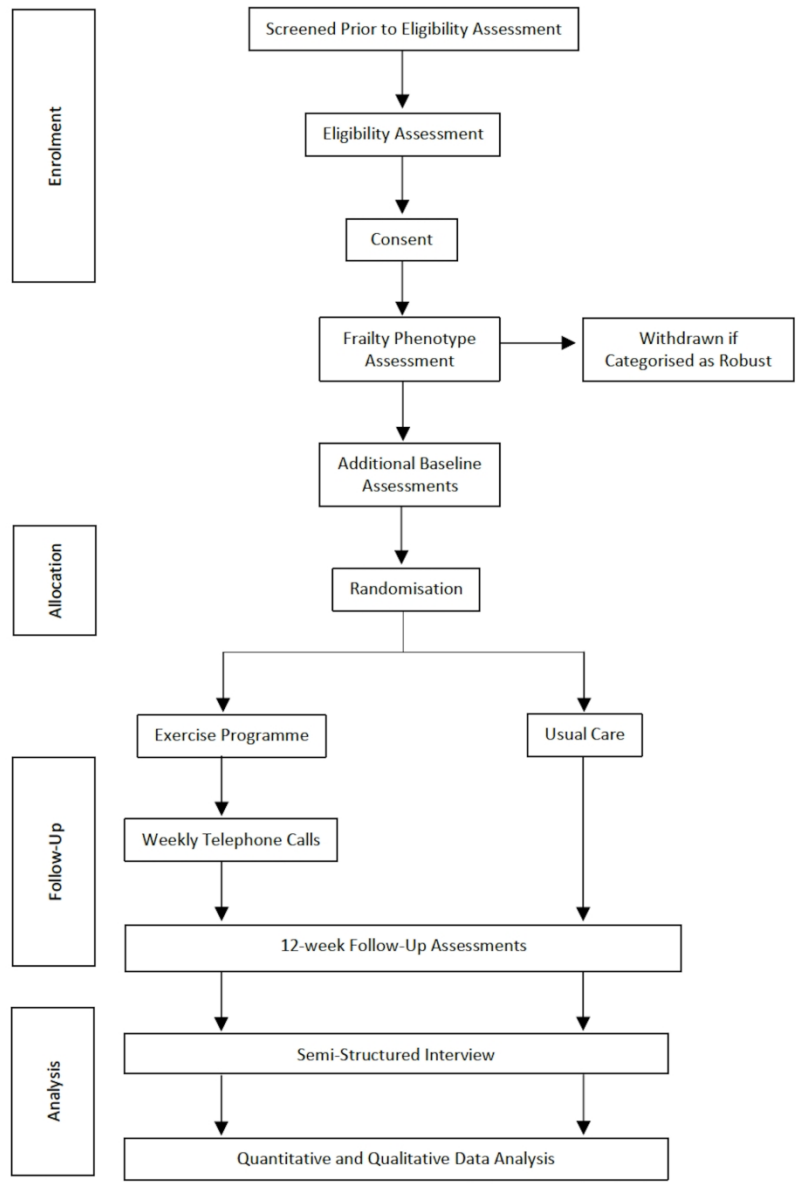

Figure 1. Study Flow Diagram.

163x228mm (300 x 300 DPI)

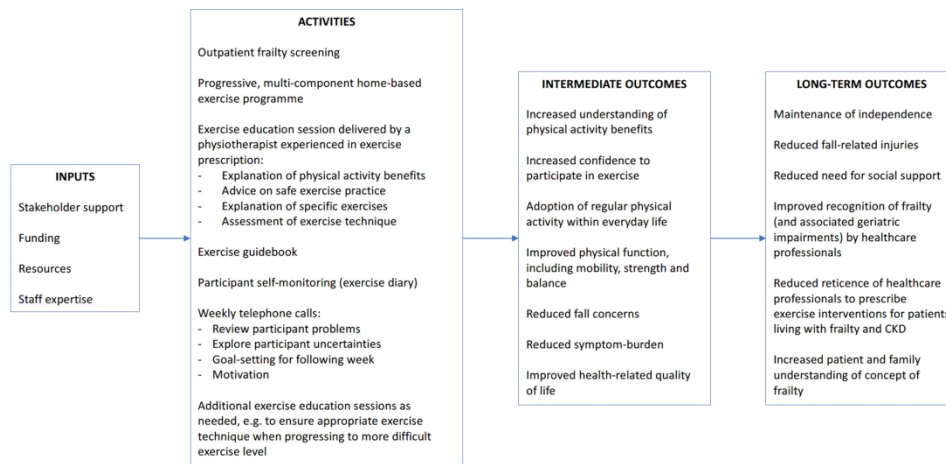

Figure 2. Exercise Intervention Logic Model.

316x153mm (300 x 300 DPI)

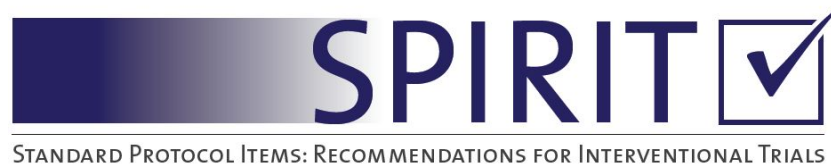

SPIRIT 2013 Checklist: Recommended items to address in a clinical trial protocol and related documents\*

| Section/item                      | Item No | Description                                                                                                                                                                                                                                                                              | Addressed on page number |
|-----------------------------------|---------|------------------------------------------------------------------------------------------------------------------------------------------------------------------------------------------------------------------------------------------------------------------------------------------|--------------------------|
| <b>Administrative information</b> |         |                                                                                                                                                                                                                                                                                          |                          |
| Title                             | 1       | Descriptive title identifying the study design, population, interventions, and, if applicable, trial acronym                                                                                                                                                                             | 1                        |
| Trial registration                | 2a      | Trial identifier and registry name. If not yet registered, name of intended registry                                                                                                                                                                                                     | 1,5                      |
|                                   | 2b      | All items from the World Health Organization Trial Registration Data Set                                                                                                                                                                                                                 | 7-25                     |
| Protocol version                  | 3       | Date and version identifier                                                                                                                                                                                                                                                              | 2                        |
| Funding                           | 4       | Sources and types of financial, material, and other support                                                                                                                                                                                                                              | 39,40                    |
| Roles and responsibilities        | 5a      | Names, affiliations, and roles of protocol contributors                                                                                                                                                                                                                                  | 1                        |
|                                   | 5b      | Name and contact information for the trial sponsor                                                                                                                                                                                                                                       | 2                        |
|                                   | 5c      | Role of study sponsor and funders, if any, in study design; collection, management, analysis, and interpretation of data; writing of the report; and the decision to submit the report for publication, including whether they will have ultimate authority over any of these activities | 39,40                    |
|                                   | 5d      | Composition, roles, and responsibilities of the coordinating centre, steering committee, endpoint adjudication committee, data management team, and other individuals or groups overseeing the trial, if applicable (see Item 21a for data monitoring committee)                         | 22                       |

1 **Introduction**

2

3 Background and 6a Description of research question and justification for undertaking the trial, including summary of relevant 7-9, 13-14  
 4 rationale studies (published and unpublished) examining benefits and harms for each intervention  
 5

6 6b Explanation for choice of comparators 7-9  
 7

8 Objectives 7 Specific objectives or hypotheses 9  
 9

10 Trial design 8 Description of trial design including type of trial (eg, parallel group, crossover, factorial, single group),  
 11 allocation ratio, and framework (eg, superiority, equivalence, noninferiority, exploratory) 10  
 12  
 13

14 **Methods: Participants, interventions, and outcomes**

15

16 Study setting 9 Description of study settings (eg, community clinic, academic hospital) and list of countries where data will 10  
 17 be collected. Reference to where list of study sites can be obtained  
 18

19 Eligibility criteria 10 Inclusion and exclusion criteria for participants. If applicable, eligibility criteria for study centres and 11,12  
 20 individuals who will perform the interventions (eg, surgeons, psychotherapists)  
 21

22 Interventions 11a Interventions for each group with sufficient detail to allow replication, including how and when they will be 13-16  
 23 administered  
 24

25 11b Criteria for discontinuing or modifying allocated interventions for a given trial participant (eg, drug dose 14-16  
 26 change in response to harms, participant request, or improving/worsening disease)  
 27

28 11c Strategies to improve adherence to intervention protocols, and any procedures for monitoring adherence 14-16  
 29 (eg, drug tablet return, laboratory tests)  
 30

31 11d Relevant concomitant care and interventions that are permitted or prohibited during the trial  
 32

33 Outcomes 12 Primary, secondary, and other outcomes, including the specific measurement variable (eg, systolic blood  
 34 pressure), analysis metric (eg, change from baseline, final value, time to event), method of aggregation (eg, 17-20  
 35 median, proportion), and time point for each outcome. Explanation of the clinical relevance of chosen  
 36 efficacy and harm outcomes is strongly recommended  
 37

38 Participant timeline 13 Time schedule of enrolment, interventions (including any run-ins and washouts), assessments, and visits for 11-12  
 39 participants. A schematic diagram is highly recommended (see Figure)  
 40  
 41  
 42  
 43  
 44  
 45  
 46

|   |             |    |                                                                                                                                                                                       |       |
|---|-------------|----|---------------------------------------------------------------------------------------------------------------------------------------------------------------------------------------|-------|
| 1 | Sample size | 14 | Estimated number of participants needed to achieve study objectives and how it was determined, including clinical and statistical assumptions supporting any sample size calculations | 12,13 |
| 2 |             |    |                                                                                                                                                                                       |       |
| 3 |             |    |                                                                                                                                                                                       |       |
| 4 | Recruitment | 15 | Strategies for achieving adequate participant enrolment to reach target sample size                                                                                                   | 11,12 |
| 5 |             |    |                                                                                                                                                                                       |       |

6 **Methods: Assignment of interventions (for controlled trials)**

7 Allocation:

|    |                     |     |                                                                                                                                                                                                                                                                                                                                                          |    |
|----|---------------------|-----|----------------------------------------------------------------------------------------------------------------------------------------------------------------------------------------------------------------------------------------------------------------------------------------------------------------------------------------------------------|----|
| 10 | Sequence generation | 16a | Method of generating the allocation sequence (eg, computer-generated random numbers), and list of any factors for stratification. To reduce predictability of a random sequence, details of any planned restriction (eg, blocking) should be provided in a separate document that is unavailable to those who enrol participants or assign interventions | 13 |
| 11 |                     |     |                                                                                                                                                                                                                                                                                                                                                          |    |
| 12 |                     |     |                                                                                                                                                                                                                                                                                                                                                          |    |
| 13 |                     |     |                                                                                                                                                                                                                                                                                                                                                          |    |
| 14 |                     |     |                                                                                                                                                                                                                                                                                                                                                          |    |
| 15 |                     |     |                                                                                                                                                                                                                                                                                                                                                          |    |

|    |                                  |     |                                                                                                                                                                                                           |    |
|----|----------------------------------|-----|-----------------------------------------------------------------------------------------------------------------------------------------------------------------------------------------------------------|----|
| 16 | Allocation concealment mechanism | 16b | Mechanism of implementing the allocation sequence (eg, central telephone; sequentially numbered, opaque, sealed envelopes), describing any steps to conceal the sequence until interventions are assigned | 13 |
| 17 |                                  |     |                                                                                                                                                                                                           |    |
| 18 |                                  |     |                                                                                                                                                                                                           |    |
| 19 |                                  |     |                                                                                                                                                                                                           |    |

|    |                |     |                                                                                                                           |    |
|----|----------------|-----|---------------------------------------------------------------------------------------------------------------------------|----|
| 20 | Implementation | 16c | Who will generate the allocation sequence, who will enrol participants, and who will assign participants to interventions | 13 |
| 21 |                |     |                                                                                                                           |    |
| 22 |                |     |                                                                                                                           |    |
| 23 |                |     |                                                                                                                           |    |

|    |                    |     |                                                                                                                                           |    |
|----|--------------------|-----|-------------------------------------------------------------------------------------------------------------------------------------------|----|
| 24 | Blinding (masking) | 17a | Who will be blinded after assignment to interventions (eg, trial participants, care providers, outcome assessors, data analysts), and how | 13 |
| 25 |                    |     |                                                                                                                                           |    |
| 26 |                    |     |                                                                                                                                           |    |

|    |  |     |                                                                                                                                                      |    |
|----|--|-----|------------------------------------------------------------------------------------------------------------------------------------------------------|----|
| 27 |  | 17b | If blinded, circumstances under which unblinding is permissible, and procedure for revealing a participant's allocated intervention during the trial | 13 |
| 28 |  |     |                                                                                                                                                      |    |
| 29 |  |     |                                                                                                                                                      |    |
| 30 |  |     |                                                                                                                                                      |    |

31 **Methods: Data collection, management, and analysis**

|    |                         |     |                                                                                                                                                                                                                                                                                                                                                                                                              |       |
|----|-------------------------|-----|--------------------------------------------------------------------------------------------------------------------------------------------------------------------------------------------------------------------------------------------------------------------------------------------------------------------------------------------------------------------------------------------------------------|-------|
| 33 | Data collection methods | 18a | Plans for assessment and collection of outcome, baseline, and other trial data, including any related processes to promote data quality (eg, duplicate measurements, training of assessors) and a description of study instruments (eg, questionnaires, laboratory tests) along with their reliability and validity, if known. Reference to where data collection forms can be found, if not in the protocol | 17-20 |
| 34 |                         |     |                                                                                                                                                                                                                                                                                                                                                                                                              |       |
| 35 |                         |     |                                                                                                                                                                                                                                                                                                                                                                                                              |       |
| 36 |                         |     |                                                                                                                                                                                                                                                                                                                                                                                                              |       |
| 37 |                         |     |                                                                                                                                                                                                                                                                                                                                                                                                              |       |

|    |  |     |                                                                                                                                                                                           |              |
|----|--|-----|-------------------------------------------------------------------------------------------------------------------------------------------------------------------------------------------|--------------|
| 38 |  | 18b | Plans to promote participant retention and complete follow-up, including list of any outcome data to be collected for participants who discontinue or deviate from intervention protocols | 11,12, 17-20 |
| 39 |  |     |                                                                                                                                                                                           |              |
| 40 |  |     |                                                                                                                                                                                           |              |
| 41 |  |     |                                                                                                                                                                                           |              |
| 42 |  |     |                                                                                                                                                                                           |              |



|    |                                 |     |                                                                                                                                                                                                                                                                                                                                       |       |
|----|---------------------------------|-----|---------------------------------------------------------------------------------------------------------------------------------------------------------------------------------------------------------------------------------------------------------------------------------------------------------------------------------------|-------|
| 1  | Data management                 | 19  | Plans for data entry, coding, security, and storage, including any related processes to promote data quality (eg, double data entry; range checks for data values). Reference to where details of data management procedures can be found, if not in the protocol                                                                     | 20    |
| 2  |                                 |     |                                                                                                                                                                                                                                                                                                                                       |       |
| 3  |                                 |     |                                                                                                                                                                                                                                                                                                                                       |       |
| 4  |                                 |     |                                                                                                                                                                                                                                                                                                                                       |       |
| 5  | Statistical methods             | 20a | Statistical methods for analysing primary and secondary outcomes. Reference to where other details of the statistical analysis plan can be found, if not in the protocol                                                                                                                                                              | 21    |
| 6  |                                 |     |                                                                                                                                                                                                                                                                                                                                       |       |
| 7  |                                 |     |                                                                                                                                                                                                                                                                                                                                       |       |
| 8  |                                 | 20b | Methods for any additional analyses (eg, subgroup and adjusted analyses)                                                                                                                                                                                                                                                              | 21    |
| 9  |                                 |     |                                                                                                                                                                                                                                                                                                                                       |       |
| 10 |                                 | 20c | Definition of analysis population relating to protocol non-adherence (eg, as randomised analysis), and any statistical methods to handle missing data (eg, multiple imputation)                                                                                                                                                       |       |
| 11 |                                 |     |                                                                                                                                                                                                                                                                                                                                       |       |
| 12 |                                 |     |                                                                                                                                                                                                                                                                                                                                       |       |
| 13 |                                 |     |                                                                                                                                                                                                                                                                                                                                       |       |
| 14 | <b>Methods: Monitoring</b>      |     |                                                                                                                                                                                                                                                                                                                                       |       |
| 15 |                                 |     |                                                                                                                                                                                                                                                                                                                                       |       |
| 16 | Data monitoring                 | 21a | Composition of data monitoring committee (DMC); summary of its role and reporting structure; statement of whether it is independent from the sponsor and competing interests; and reference to where further details about its charter can be found, if not in the protocol. Alternatively, an explanation of why a DMC is not needed | 20    |
| 17 |                                 |     |                                                                                                                                                                                                                                                                                                                                       |       |
| 18 |                                 |     |                                                                                                                                                                                                                                                                                                                                       |       |
| 19 |                                 |     |                                                                                                                                                                                                                                                                                                                                       |       |
| 20 |                                 |     |                                                                                                                                                                                                                                                                                                                                       |       |
| 21 |                                 |     |                                                                                                                                                                                                                                                                                                                                       |       |
| 22 |                                 | 21b | Description of any interim analyses and stopping guidelines, including who will have access to these interim results and make the final decision to terminate the trial                                                                                                                                                               | 21    |
| 23 |                                 |     |                                                                                                                                                                                                                                                                                                                                       |       |
| 24 |                                 |     |                                                                                                                                                                                                                                                                                                                                       |       |
| 25 | Harms                           | 22  | Plans for collecting, assessing, reporting, and managing solicited and spontaneously reported adverse events and other unintended effects of trial interventions or trial conduct                                                                                                                                                     | 21    |
| 26 |                                 |     |                                                                                                                                                                                                                                                                                                                                       |       |
| 27 |                                 |     |                                                                                                                                                                                                                                                                                                                                       |       |
| 28 | Auditing                        | 23  | Frequency and procedures for auditing trial conduct, if any, and whether the process will be independent from investigators and the sponsor                                                                                                                                                                                           | 21-22 |
| 29 |                                 |     |                                                                                                                                                                                                                                                                                                                                       |       |
| 30 |                                 |     |                                                                                                                                                                                                                                                                                                                                       |       |
| 31 |                                 |     |                                                                                                                                                                                                                                                                                                                                       |       |
| 32 | <b>Ethics and dissemination</b> |     |                                                                                                                                                                                                                                                                                                                                       |       |
| 33 |                                 |     |                                                                                                                                                                                                                                                                                                                                       |       |
| 34 | Research ethics approval        | 24  | Plans for seeking research ethics committee/institutional review board (REC/IRB) approval                                                                                                                                                                                                                                             | 22    |
| 35 |                                 |     |                                                                                                                                                                                                                                                                                                                                       |       |
| 36 |                                 |     |                                                                                                                                                                                                                                                                                                                                       |       |
| 37 | Protocol amendments             | 25  | Plans for communicating important protocol modifications (eg, changes to eligibility criteria, outcomes, analyses) to relevant parties (eg, investigators, REC/IRBs, trial participants, trial registries, journals, regulators)                                                                                                      | 22    |
| 38 |                                 |     |                                                                                                                                                                                                                                                                                                                                       |       |
| 39 |                                 |     |                                                                                                                                                                                                                                                                                                                                       |       |
| 40 |                                 |     |                                                                                                                                                                                                                                                                                                                                       |       |
| 41 |                                 |     |                                                                                                                                                                                                                                                                                                                                       |       |
| 42 |                                 |     |                                                                                                                                                                                                                                                                                                                                       |       |

|    |                               |     |                                                                                                                                                                                                                                                                                     |          |
|----|-------------------------------|-----|-------------------------------------------------------------------------------------------------------------------------------------------------------------------------------------------------------------------------------------------------------------------------------------|----------|
| 1  | Consent or assent             | 26a | Who will obtain informed consent or assent from potential trial participants or authorised surrogates, and how (see Item 32)                                                                                                                                                        | 11,12    |
| 2  |                               |     |                                                                                                                                                                                                                                                                                     |          |
| 3  |                               |     |                                                                                                                                                                                                                                                                                     |          |
| 4  |                               | 26b | Additional consent provisions for collection and use of participant data and biological specimens in ancillary studies, if applicable                                                                                                                                               |          |
| 5  |                               |     |                                                                                                                                                                                                                                                                                     |          |
| 6  |                               |     |                                                                                                                                                                                                                                                                                     |          |
| 7  | Confidentiality               | 27  | How personal information about potential and enrolled participants will be collected, shared, and maintained in order to protect confidentiality before, during, and after the trial                                                                                                | 20       |
| 8  |                               |     |                                                                                                                                                                                                                                                                                     |          |
| 9  |                               |     |                                                                                                                                                                                                                                                                                     |          |
| 10 | Declaration of interests      | 28  | Financial and other competing interests for principal investigators for the overall trial and each study site                                                                                                                                                                       | 39,40    |
| 11 |                               |     |                                                                                                                                                                                                                                                                                     |          |
| 12 |                               |     |                                                                                                                                                                                                                                                                                     |          |
| 13 | Access to data                | 29  | Statement of who will have access to the final trial dataset, and disclosure of contractual agreements that limit such access for investigators                                                                                                                                     |          |
| 14 |                               |     |                                                                                                                                                                                                                                                                                     |          |
| 15 |                               |     |                                                                                                                                                                                                                                                                                     |          |
| 16 | Ancillary and post-trial care | 30  | Provisions, if any, for ancillary and post-trial care, and for compensation to those who suffer harm from trial participation                                                                                                                                                       |          |
| 17 |                               |     |                                                                                                                                                                                                                                                                                     |          |
| 18 |                               |     |                                                                                                                                                                                                                                                                                     |          |
| 19 |                               |     |                                                                                                                                                                                                                                                                                     |          |
| 20 | Dissemination policy          | 31a | Plans for investigators and sponsor to communicate trial results to participants, healthcare professionals, the public, and other relevant groups (eg, via publication, reporting in results databases, or other data sharing arrangements), including any publication restrictions | 23       |
| 21 |                               |     |                                                                                                                                                                                                                                                                                     |          |
| 22 |                               |     |                                                                                                                                                                                                                                                                                     |          |
| 23 |                               |     |                                                                                                                                                                                                                                                                                     |          |
| 24 |                               | 31b | Authorship eligibility guidelines and any intended use of professional writers                                                                                                                                                                                                      |          |
| 25 |                               |     |                                                                                                                                                                                                                                                                                     |          |
| 26 |                               | 31c | Plans, if any, for granting public access to the full protocol, participant-level dataset, and statistical code                                                                                                                                                                     | 23       |
| 27 |                               |     |                                                                                                                                                                                                                                                                                     |          |
| 28 |                               |     |                                                                                                                                                                                                                                                                                     |          |
| 29 | <b>Appendices</b>             |     |                                                                                                                                                                                                                                                                                     |          |
| 30 |                               |     |                                                                                                                                                                                                                                                                                     |          |
| 31 | Informed consent materials    | 32  | Model consent form and other related documentation given to participants and authorised surrogates                                                                                                                                                                                  | Attached |
| 32 |                               |     |                                                                                                                                                                                                                                                                                     |          |
| 33 |                               |     |                                                                                                                                                                                                                                                                                     |          |
| 34 | Biological specimens          | 33  | Plans for collection, laboratory evaluation, and storage of biological specimens for genetic or molecular analysis in the current trial and for future use in ancillary studies, if applicable                                                                                      |          |
| 35 |                               |     |                                                                                                                                                                                                                                                                                     |          |
| 36 |                               |     |                                                                                                                                                                                                                                                                                     |          |

\*It is strongly recommended that this checklist be read in conjunction with the SPIRIT 2013 Explanation & Elaboration for important clarification on the items. Amendments to the protocol should be tracked and dated. The SPIRIT checklist is copyrighted by the SPIRIT Group under the Creative Commons [“Attribution-NonCommercial-NoDerivs 3.0 Unported”](https://creativecommons.org/licenses/by-nc-nd/3.0/) license.
